# Essential role of Bone morphogenetic protein 15 in porcine ovarian and follicular development and ovulation

Yufeng Qin, Tao Tang, Wei Li, Zhiguo Liu, Xiaoliang Yang, Xuan Shi, Guanjie Sun, Xiaofeng Liu, Min Wang, Xinyu Liang, Peiqing Cong, Delin Mo, Xiaohong Liu, Yaosheng Chen\* and Zuyong He\*

<sup>1</sup> State Key Laboratory of Biocontrol, School of Life Sciences, Sun Yat-sen University, Guangzhou 510006, P. R. China.

\* Correspondence and requests for materials should be addressed to Yaosheng Chen (email: chyaosh@mail.sysu.edu.cn) or Zuyong He (email:zuyonghe@foxmail.com)

## ABSTRACT

Bone morphogenetic protein 15 (BMP15) is a multifunctional oocyte-specific secreted factor. It controls female fertility and follicular development in both species-specific and dosage-sensitive manners. Previous studies found that BMP15 played a critical role on follicular development and ovulation rate of mono-ovulatory mammalian species, but has minimal impact on poly-ovulatory mice. However, whether this is true in non-rodent poly-ovulatory species need to be validated. To investigate this question, we generated a BMP15 knockdown pig model. We found that BMP15 knockdown gilts showed markedly reduced fertility accompanied with phenotype of dysplastic ovaries containing significantly declined number of follicles, increased number of abnormal follicles, and abnormally enlarged antral follicles resulting in disordered ovulation. Molecular and transcriptome analysis revealed that knockdown of *BMP15* significantly suppressed cell proliferation, differentiation, *Fshr* expression, leading to premature luteinization and reduced estradiol production in GCs, and simultaneously decreased the quality and meiotic maturation of oocyte. Our results provide *in vivo* evidences for the essential role of BMP15 in porcine ovarian and follicular development, and new insight into the complicated regulatory function of BMP15 in female fertility of poly-ovulatory species.

**KEY WORDS:** BMP15; transgenic pig; follicular development; ovarian development

## Introduction

In the past three decades, increasing studies have revealed the important role of the oocyte-specific secreted factor BMP15 in mammalian ovarian and follicular development through exerting its multiple functions including promoting granulosa cells proliferation and steroidogenesis (Moore et al., 2003; Moore and Shimasaki, 2005; Otsuka et al., 2001; Otsuka et al., 2000), preventing cell apoptosis and premature

luteinization(Chang et al., 2013; Hussein et al., 2005; Juengel et al., 2011; McNatty et al., 2005; Zhai et al., 2013), regulating glycometabolism and lipid metabolism(Su et al., 2008; Sugiura et al., 2007), controlling oocyte competence and ovulation(Fabre et al., 2006a; Hussein et al., 2006). As a key signaling molecular mediating the dialogue between oocyte and its surrounding somatic cells(Gilchrist et al., 2008), BMP15 expresses initially in early follicle stage, and gradually increases in subsequent follicle stages to the period of ovulation and/or luteinization(Paradis et al., 2009; Sun et al., 2010). This expression pattern is a little different in species, for example, initial expression of BMP15 protein can be found in primary follicle stage of sheep, human and pig, but didn't in mice until pre-ovulatory stage(Paulini and Melo, 2011). BMP15 protein secretes and functions as BMP15/BMP15 homodimers and BMP15/GDF9 (growth differentiation factor 9) heterodimers, through binding to the membrane bound type II serine/threonine kinase BMP receptor (BMPR2) and type I activin receptor-like kinase ALK6, resulting in the phosphorylation and activation of SMAD pathways(Liao et al., 2003; Mottershead et al., 2013; Pulkki et al., 2012). In particular, BMP15 homodimers are considered to bind to ALK6 receptor to activate the Smad1/5/8 signaling pathway in some species, for example in human and sheep but not in rodent. While BMP15/GDF9 heterodimers are considered to bind to BMPR2 receptor to activate Smad2/3 signaling pathway in all reported species (sheep, human, mouse, pig at al)(Lin et al., 2014; Peng et al., 2013; Reader et al., 2011; Reader et al., 2016). In most cases, BMP15/GDF9 heterodimers were more potent in regulation of GCs, oocyte, and zygote development(Peng et al., 2013).

BMP15 mutations or deficiency has been associated with altered female fertility in different species. As previously reported, natural mutations in BMP15 of sheep can lead to increased ovulation rate and litter size in heterozygotes, but infertility in homozygotes due to bilateral ovarian hypoplasia(Braw-Tal et al., 1993; Fabre et al., 2006b; Galloway et al., 2000; Smith et al., 1997). Altered fertility also has been reported in sheep immunized with BMP15 mature protein or different region of peptides(Juengel et al., 2002; Juengel et al., 2004; Juengel et al., 2013; McNatty et al., 2007). In human, BMP15 mutations have been associated with primary ovarian insufficiency (POI) and infertility phenotype of women(Abir et al., 2014; Al-ajoury et al., 2015; Chand et al., 2006). However, in the poly-ovulatory mice, there was no significant difference between *BMP15*<sup>+/-</sup> females and wild-type in ovulation rate, and only a mild reduction of fertility in *BMP15* null female mice(Yan et al., 2001). Several studies have attempted to determine whether there are species-specific differences in the BMP15 system that may play causal roles in the differences in fertility observed in mono-ovulatory mouse and poly-ovulatory sheep and humans. One study has attributed the species-specific differences to the temporal variations in the production of the mature form of BMP15. They found that mouse BMP15 mature protein was barely detectable until preovulatory stage, when it is markedly increased(Yoshino et al., 2006). They subsequently found that defects in the production of mouse BMP15 mature protein could

67 correlate with species-specific differences(Hashimoto et al., 2005). Moreover, a phylogenetic analysis found  
68 that a better conservation in areas involved in dimer formation and stability of BMP15 within mono-ovulatory  
69 species, but high variations in these areas within poly-ovulatory species, implying the correlation with altered  
70 equilibrium between homodimers and heterodimers, and modified biological activity for allowing  
71 polyovulation to occur(Monestier et al., 2014). Hence, it seems that the role of BMP15 in regulation of  
72 follicular development and ovulation rate was more critical in mono-ovulatory mammalian species than  
73 poly-ovulatory animals. However, whether BMP15 is essential to ovarian and follicular development in  
74 poly-ovulatory mammalian species still remains unclear, as this has not yet been tested in *in vivo* studies of  
75 non-rodent poly-ovulatory mammals.

76 In this study, we aim to investigate the function of BMP15 on female fertility and follicular development  
77 of non-rodent poly-ovulatory mammal by using a *BMP15* knockdown transgenic pig model. The transgenic  
78 (TG) gilts appeared decreased female fertility with phenotypes of disordered estrous cycle, significant  
79 reduced ovarian size and follicle number, higher ratio of abnormal follicles, and none corpus lutein formed  
80 before 365 days old. We found that knocking down of *BMP15* can impair porcine follicle growth and cause  
81 dysovulation mainly by affecting oocyte quality and oocyte meiotic maturation, and suppressing GCs  
82 proliferation and GCs functions, including inhibiting the expression of *Fshr* and E2 production, resulting in  
83 premature luteinization. These effects on follicular cell functions could finally lead to absence of dominant  
84 follicle selection but appearance of abnormally enlarged antral follicles with ovulation dysfunction in  
85 transgenic gilts. Our findings were evidently different from the unchanged fertility of *BMP15*<sup>+/-</sup> mice, strongly  
86 suggesting the important role of BMP15 in non-rodent poly-ovulatory mammals, thus providing the basis for  
87 further investigation of the different regulatory role of BMP15 between mono-and poly-ovulatory mammals.

## 88

## 89 RESULTS

### 90 Generation and identification of *BMP15* knockdown pig model .

91 To generated the *BMP15* RNA interference transgenic pig model, we first designed and constructed 5  
92 pEGFP-*BMP15*-shRNA plasmids, in which *BMP15* shRNA sequence was under control of human U6  
93 promoter, then inserted downstream of the *EGFP* expression cassette (Fig. 1A). Each shRNA expression  
94 plasmids was respectively cotransfected into HEK293T cell with a psiCheck II -*BMP15* plasmid to examine  
95 their RNA interference efficiency *in vitro*. We found shRNA1 was most effective with a RNA inference  
96 efficiency reaching to 76% (Fig. 1B), thus this shRNA was selected for transfection into embryonic fibroblast  
97 cells (PEFs) derived from a male Yorkshire pig. Transfected PEFs then were subjected to G418 selection to  
98 screen the cells with stable expression of EGFP as donor cells for somatic cell nuclear transfer (SCNT). Clone  
99 embryos then were transferred into Large White sow recipients to generate F0 TG pigs as described in our

previous report(Liu et al., 2019) (Fig. S1A). We obtained two healthy F0 TG males at last. After sexual maturity, one F0 TG boar was mated with wild-type sows to generate F1 TG gilts for subsequent experiments.

Both F0 and F1 TG pigs showed visible intense GFP fluorescence on toes and muscle while subjected to sunlight (Fig. 1C, Fig. S1B), directly suggesting that the pEGFP-*BMP15* shRNA plasmid was successfully integrated into the genome of F0 TG boar, and can be transmitted to the next generation through the germline. This was confirmed by PCR analysis of fragment of integrated plasmid in muscle tissue of F1 TG gilts (Fig. S2A). The copy number of integrated plasmid was estimated to be approximate seven in F1 TG pigs through the combination of both qPCR that using a *transferrin receptor* gene to normalize the genomic DNA (data not shown), and Southern blot analysis (Fig. S2B). More importantly, evidently decrease level of *BMP15* mRNA (Fig. 1E) in 365 days old TG ovaries and *BMP15* protein level in 30 days old TG ovaries (Fig. 1F, G) strongly demonstrated the successful generation of the *BMP15* knockdown model, and implied an *in vivo* *BMP15* knockdown efficiency of about 50% in TGF ovaries. Our qPCR data also revealed that *BMP15* mRNA was highly expressed in ovary tissue, exhibited a very low level in the pituitary (Fig. 1D), but was undetectable in another porcine tissues (e.g., liver, muscle, kidney).

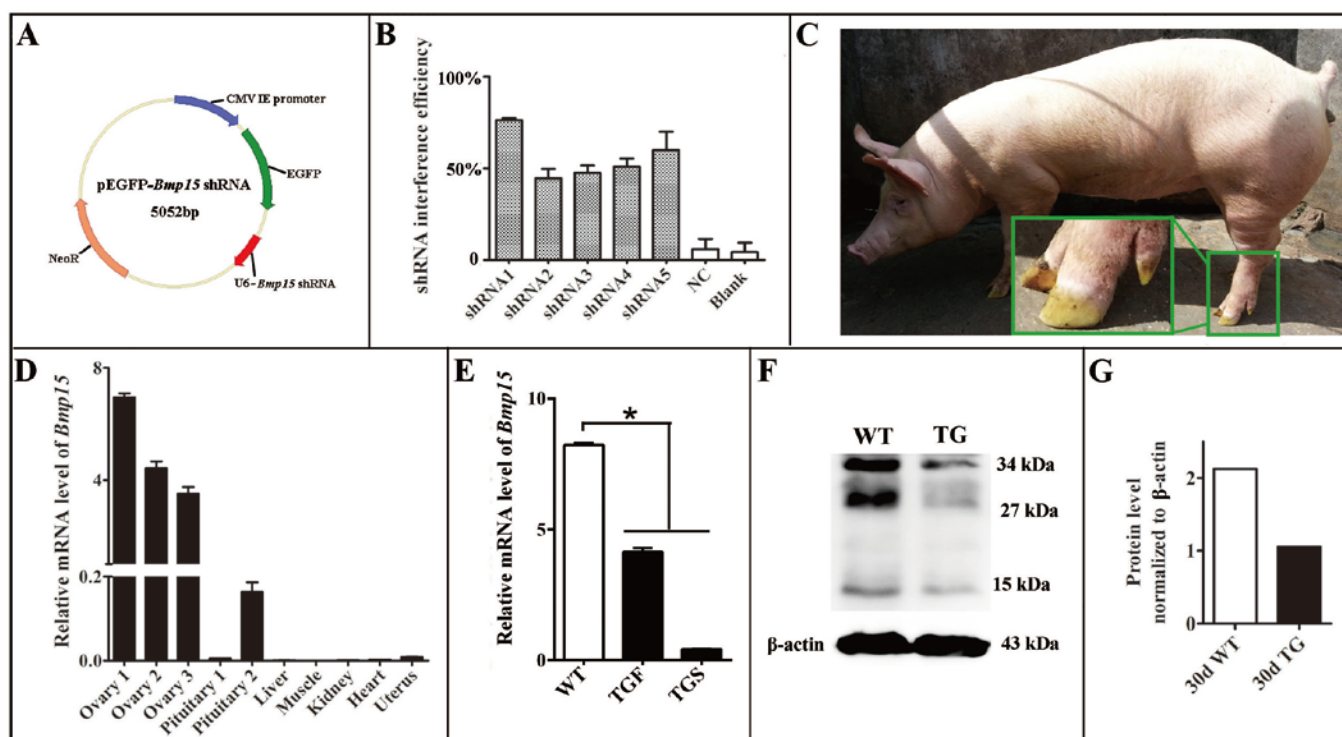

**Fig. 1. Generation of the *BMP15* knockdown pig model.** (A) Diagram of shRNA expression vector. Synthesized *hU6-BMP15* shRNA fragment was inserted downstream of *EGFP* expression cassette on pEGFP-N1 vector. (B) RNA interference efficiency of 5 *BMP15* shRNAs was examined by a dual-luciferase reporter system after 48 h transfection of h293T cells. NC, random shRNA plasmid. (C) F1 TG gilt showed a visible GFP fluorescence on the toes while under sunlight. (D) Tissue-specific mRNA expression profile of *BMP15* WT pigs. (E) qPCR analysis of *BMP15* mRNA level in 365 days old transgenic ovaries with two different phenotypes (TGF and TGS). TGF, transgenic ovary with many visible antral follicles on ovarian

122 surface. TGS, transgenic ovary with streak phenotype. \* $P < 0.05$ . (F) Western blot analysis of BMP15 protein  
123 level in postnatal 30 days old TG ovaries. Three prominent, distinct bands were observed corresponding to  
124 apparent molecular weights of 34 kDa, 27 kDa, and 15 kDa. (G) Quantitative analysis of BMP15 protein  
125 levels based on the band intensity in f by using Image J software.

### 127 **Knockdown of *BMP15* was associated with disordered reproductive cycle of TG gilts.**

128 All F1 TG gilts presented normal appearance and growth condition, and 50 of them at age of 170 to 400 days  
129 old were checked daily for signs of oestrus in the presence of an intact mature boar. Surprisingly, we didn't  
130 find any obvious estrous behavior or vulvar appearance changes (e.g., increased redness, swelling or mucus  
131 production) in sexually mature TG gilts (Fig. S3A). About twenty gilts at age of 240 to 400 days were bred by  
132 artificial insemination (AI) after treatment with PG600, but all failed to become pregnant. To determine  
133 whether the disordered estrous cycle in TG gilts was related to altering reproductive hormone changes, we  
134 measured the concentration of plasma estrogen (E2), progesterone (P4) and follicle stimulating hormone  
135 (FSH) in 365 days old gilts throughout the estrous cycle. The results showed that a typical peripheral E2  
136 concentration peak before the onset of estrous can be observed in WT gilts, which is consistent with previous  
137 studies (Soede et al., 2011) (Fig. 2A). In contrast, irregular E2 concentration peaks were observed in TG gilts  
138 during the continuous 24 days measurement (Fig. 2B). Vaginal smears cytology analysis (Mayor et al., 2007)  
139 further proved the disordered estrous cycle occurred in TG gilts, as irregular cytologic changes was observed  
140 through 16 days continuous examination (Fig. S3C). Furthermore, the average level of peripheral P4  
141 concentration was significant lower in two TG gilts, (Fig. 2C), while higher serum FSH concentration was  
142 found in two of the three TG gilts (Fig. S3B). In addition, we found over 2-fold up-regulated expression of  
143 *Fsh* mRNA level in the pituitary of both 150 and 260 day TG gilts (Fig. 2D), but no significant difference in  
144 the expression level of *luteinizing hormone (Lh)* simultaneous (Fig. 2E). These results indicated a disordered  
145 reproductive cycle and potential ovarian dysfunction in TG gilts.

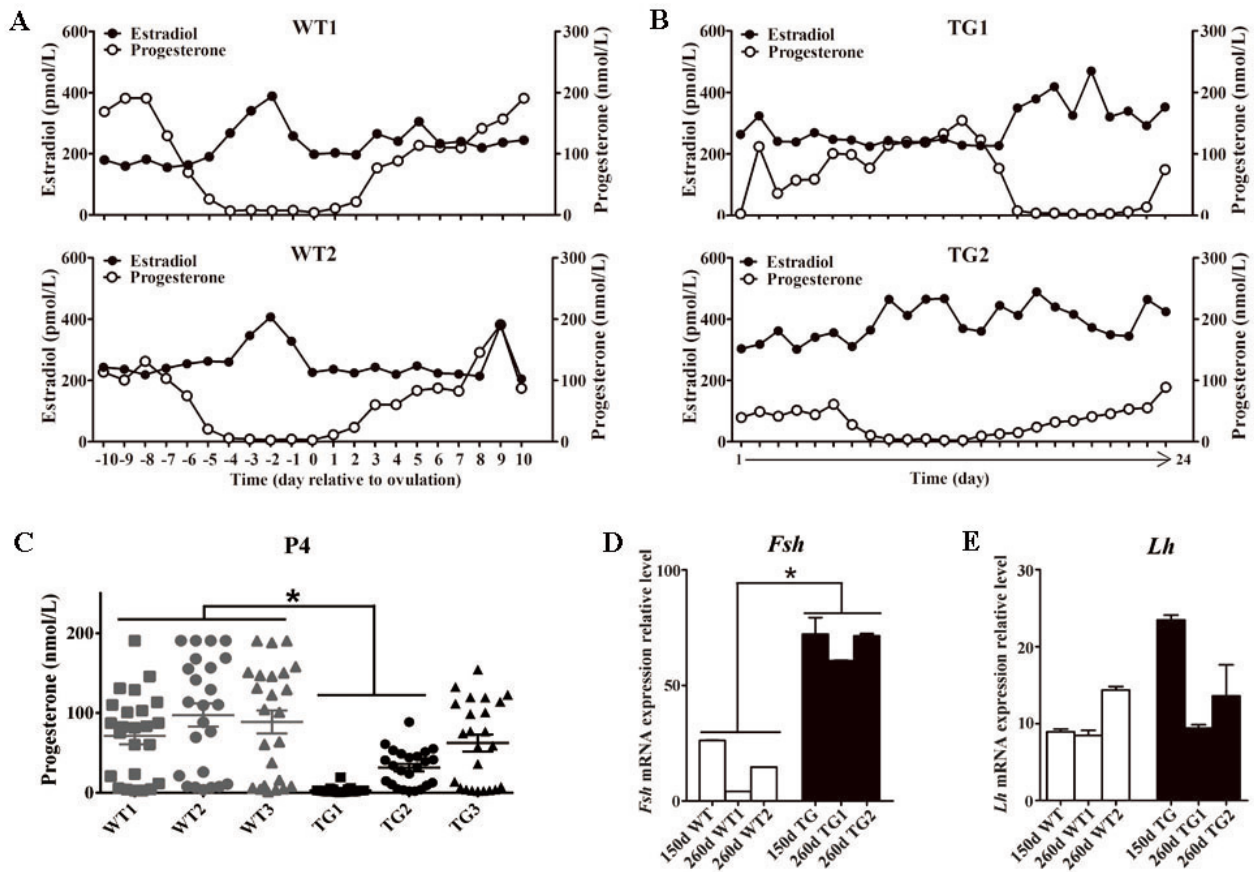

146  
 147 **Fig. 2. TG gilts presented disordered estrous cycle and reproductive hormones.** Plasma E2 and P4  
 148 concentration of 365-day old WT and TG gilts were measured at a 24h interval for 24 days. (A) During the  
 149 estrous cycle, two representative WT gilts showed typical serum E2 concentration peak before ovulation,  
 150 accompanied with marked decreased P4 concentration. (B) Irregular plasma E2 concentration peaks was  
 151 observed in two representative TG gilts in continuous 24 days measurement. (C) The average P4  
 152 concentration of two of the three TG gilts in continuous 24 days measurement was significantly lower than  
 153 WT gilts. ( $P < 0.05$ ). Each point stands for a P4 concentration value. (D) Expression level of *Fsh* mRNA in the  
 154 pituitary of both 150 and 260 day TG gilts were all more than 2-fold higher than WT gilts. ( $P < 0.05$ ). (E) The  
 155 average level of *Lh* mRNA level in pituitary was not significantly different between TG and WT gilts.

157 **Knockdown of *BMP15* led to inhibition of follicular development and ovulation in TG ovaries.**

158 Since the estrous cycle is determined by ovarian and follicular development (Noguchi et al., 2010), the  
 159 disordered estrous cycle of TG gilts potentially caused by impaired ovarian follicular development. In this  
 160 regard, ovaries from gilts of different ages were collected and processed for morphological examination.  
 161 Surprisingly, we found remarkably decreased size in TG ovarian and number of antral follicles (AFs) on the  
 162 surface of TG ovaries of 140 to 365-day old gilts (Fig. 3A). In addition, apparent size difference was observed  
 163 between bilateral TG ovaries (Fig. 3A). Corpus lutein was not observed in TG ovaries from 140 to 365 days  
 164 old gilts, but can be found in 400 and 500 day TGF ovaries (Fig. S4A). Besides, the weight of TG ovaries  
 165 before sexual maturity was markedly lower than WT ovaries (Table S4). Among the TG ovaries, we

166 discovered 8 streak ovaries, denoted as TGS ovaries, in 6 gilts at age of 110 to 365 days, presenting an  
167 incidence of about 14%, while no streak ovary was found in WT ovaries (Fig. 3A,B). These TGS ovaries  
168 contained none or less than 3 visible AFs on the ovarian surface. In cortex of TGS ovaries from 110 and  
169 200-day old gilts, most follicles were arrested in primary stage (Fig. 3B, E). In cortex of TGS ovaries from 365  
170 day old gilts most follicles were arrested in secondary stage, and degradation of follicles became apparent (Fig.  
171 3B). In different to TGS ovaries, the rest of TG ovaries contained many visible large AFs on the surface. We  
172 denoted them as TGF ovaries (Fig. 3A, C). Different stage of follicles can be found in these TGF ovaries,  
173 however, the follicle number decreased drastically during follicular development (Fig. 3D, E). Notably,  
174 during the early follicle stage, the significantly decline of primordial and primary follicle number led to a  
175 much thinner ovarian cortex in TGF ovaries of pre-puberty gilts. In addition, structural abnormality of SFs  
176 was evident, particularly in TGF ovaries of puberty gilts (Fig. 3C, G, H, Fig. S4B). We observed abnormally  
177 enlarged (Fig. 3H) or degenerated oocytes (Fig. 3Gii), multiocytic follicles (Fig. 3Gi) highly irregular GC  
178 layers (Fig. 3Gii,iv) and degraded GCs (Fig. 3Giv), and abnormally thickened theca layers (Fig. 3Giii). These  
179 follicular abnormalities in certain extent were similar to those found in previous studies on animals with  
180 natural BMP15 mutations and immunized with BMP15 peptides (Juengel et al., 2009; Juengel et al., 2002;  
181 McNatty et al., 2007; Smith et al., 1997). Furthermore, a statistical counting on the ovarian sections from 5 TG  
182 gilts at age of 160 to 400 days showed an markedly reduced proportion of normal SFs in the TGF ovaries (Fig.  
183 3F).

184 Histological observation also revealed some striking features of TGF AFs. Most notably, AF number  
185 declined remarkably, but its antrum was enlarged substantially (Fig. 3C), and surrounded by loosely organized  
186 smaller GCs (Fig. 3I). We further isolated the AFs from three 365-day TGF ovaries derived from different  
187 gilts for statistical analysis. The results showed that TGF ovaries contained less total number of AFs, and also  
188 the number of small AFs (diameter<5mm), however, it contained substantially more large AFs with  
189 diameter >5mm (Fig. 4A, B). We found the diameter of the largest AF in TGF ovary can reach to 9 mm, while  
190 this was about 7 mm in WT ovaries (Fig. 4C). Normally, porcine AFs stop growth at diameter about 5mm,  
191 only selected follicles continue to grow through accumulation of follicular fluid, and ovulate at a diameter  
192 about 7mm (Soede et al., 2011). Thus the increased abnormally enlarged AFs in the TGF ovaries may be  
193 related to dysovulation and the disordered serum reproductive hormones found in TG gilts. Subsequent  
194 measurement of the concentration of reproductive hormones in follicular fluid of TGF large AFs (diameter >5  
195 mm) showed that the E2 concentration was remarkably lower (Fig. 4D), but the concentration of other three  
196 hormones including P4 (Fig. 4E), FSH (Fig. S4C) and LH (Fig. S4D) all was not significant different from that  
197 in WT large AFs. Reduced E2 production in these TGF large follicles may imply an absence of dominant  
198 follicle selection (Clement and Monniaux, 2013). Taken these results together, we provided convincing

199 evidence that knocking down of *BMP15* could severely inhibit both follicular development and ovulation of  
 200 polyo-vulatory pig.  
 201

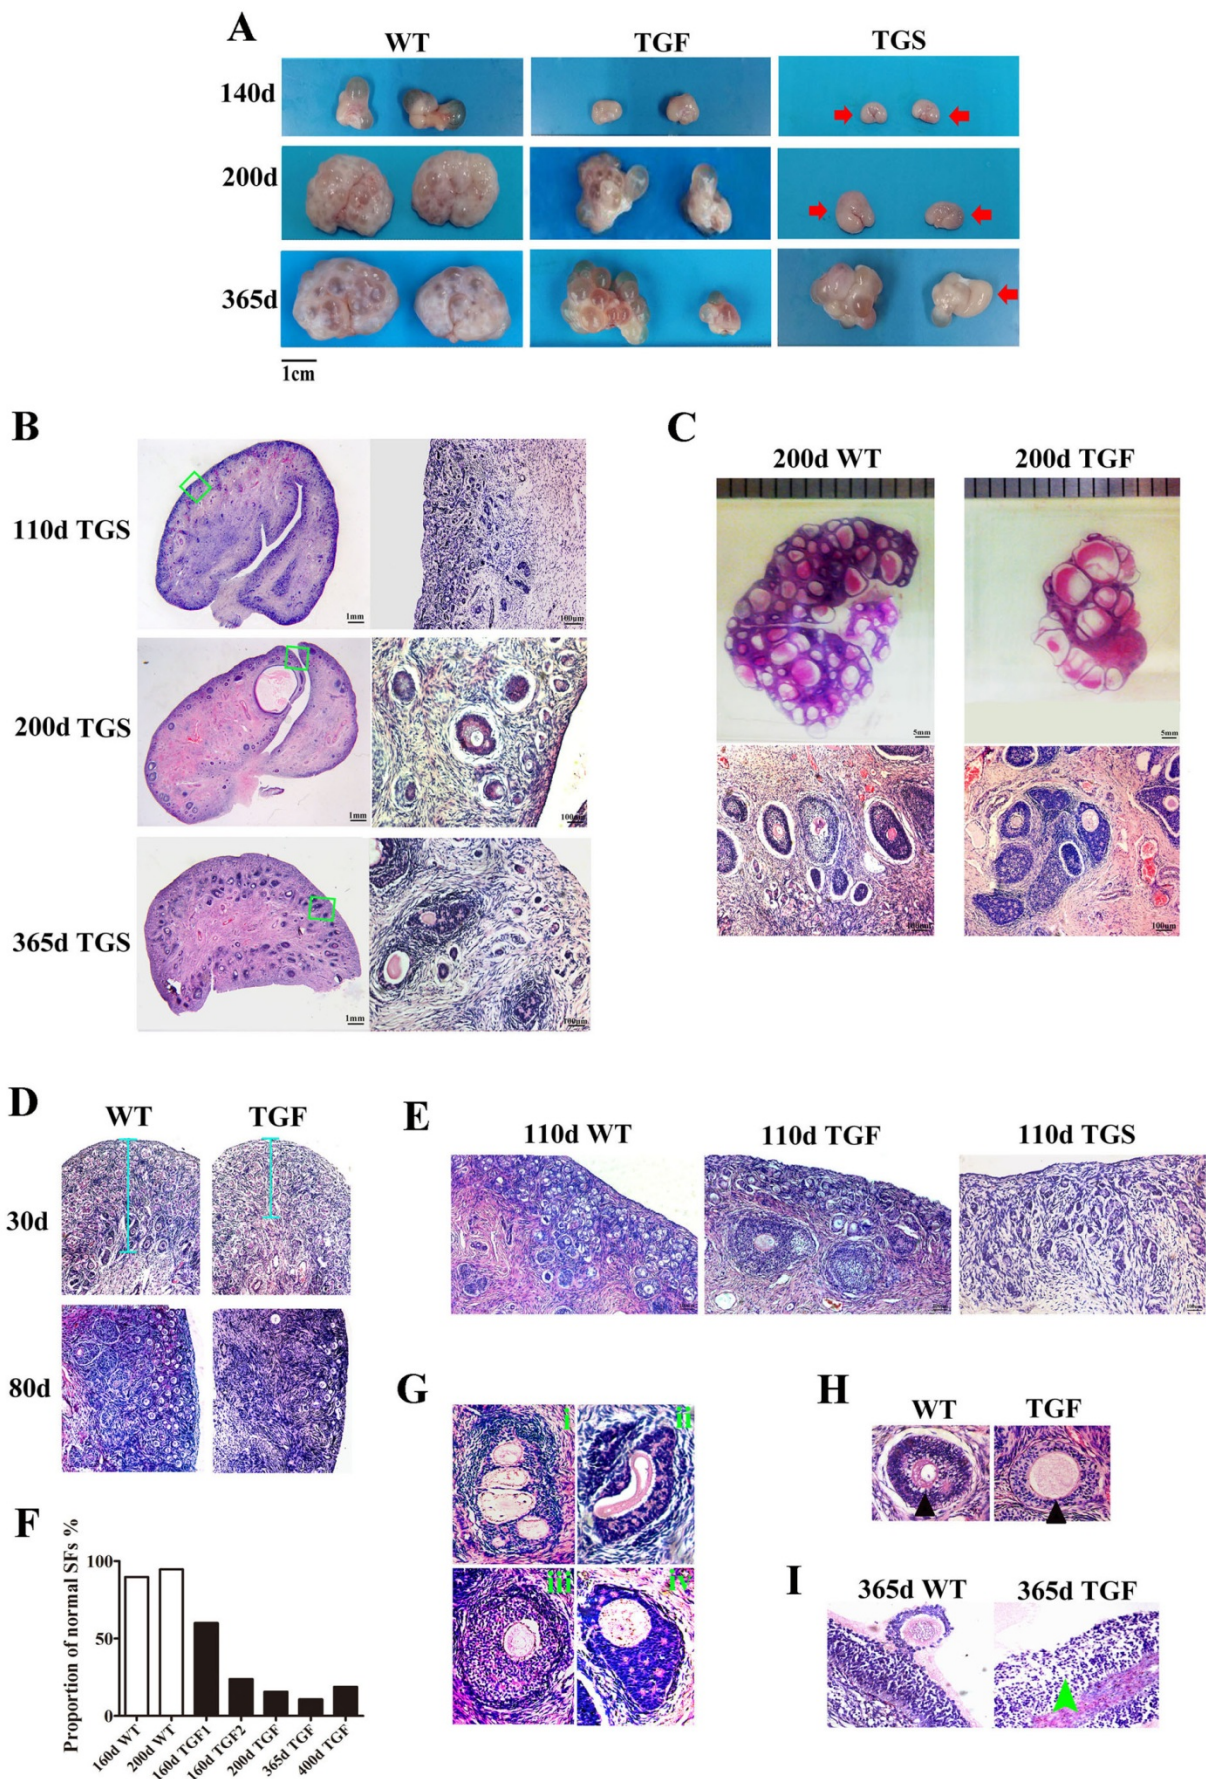



204 **Fig. 3. Affected ovarian and follicular development by knocking down of BMP15.** (A) Representative  
205 photographs of ovaries collected from gilts of different ages showed reduced ovarian size and less visible  
206 follicles on the surface of TG ovaries as compared to ovaries from WT sibling. Bilateral TG ovaries were  
207 significantly different in size at age of 200 and 365 days. Two ovarian phenotypes were identified, TGF  
208 ovaries had many visible large antral follicles on the ovarian surface. TGS ovaries contained none or less than  
209 three visible antral follicles (red arrows). (B) Histological observation of TGS ovaries showed that 110-day  
210 TGS ovary presented major primary-like follicles sparsely scattered on the cortex, while 365-day TGS ovarian  
211 section was predominantly occupied by degraded secondary follicles. (C) On 200-day TGF ovarian section,  
212 decreased number of follicles, while enlarged antrum of antral follicles was observed. In addition, degradation  
213 of GCs in abnormally organized GC layer structure of secondary follicles was observed. (D) In 30 and 80-day  
214 TGF ovaries, drastically decreased number of early stage follicles led to thinner ovarian cortex (blue line). (E)  
215 Comparison of three ovarian phenotypes at age of 110 days showed less number of early stage follicles in TGF  
216 ovarian cortex, and the minimum number of follicles in TGS ovaries. (F) Results of a follicle number counting  
217 showed markedly reduced proportion of normal secondary follicles in the TGF ovaries. Secondary follicles in  
218 three sections of each ovary were counted. (G) Representative images of abnormal TGF secondary follicles,  
219 including multiovular follicle with highly irregularly organized theca cell layers (i); follicle with oocyte-free  
220 structure, and abnormally thickened zona pellucida surrounded by highly degraded GCs (ii); follicle with  
221 abnormally thickened theca layers (iii); follicle with enlarged oocyte surrounded by highly irregularly  
222 organized GC layers with holes formed by degradation of GCs (iv). (H) TGF follicle showed larger oocyte in  
223 the early secondary follicle stage (black arrow head). (I) Smaller GCs were loosely organized in TGF antral  
224 follicles (green arrow).

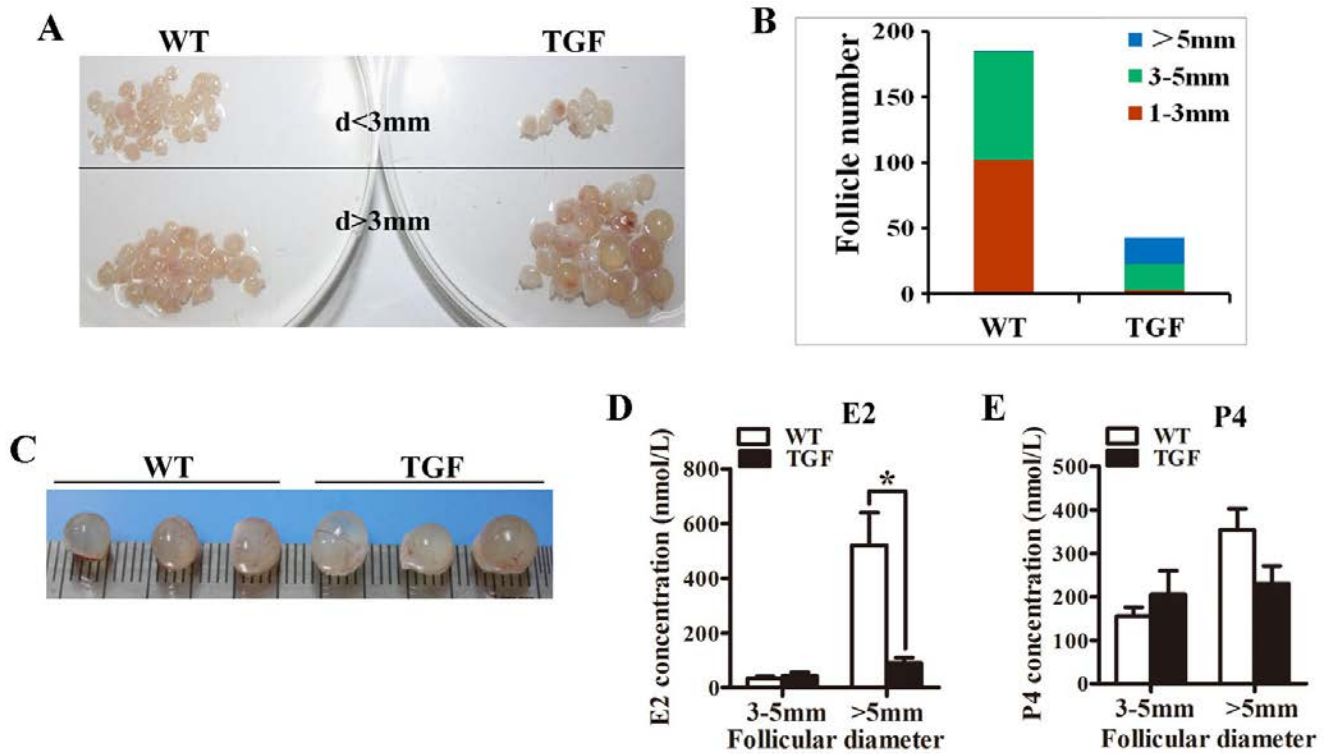

**Fig. 4. Transgenic ovaries contained abnormally enlarged antral follicles with dramatically reduced concentration of follicular fluid E2.** (A) Photographs of the isolated antral follicle of 365-day ovaries demonstrated remarkably declined number of antral follicles with a diameter <3 mm in TGF ovaries. (B) Statistical data showed reduced total number of antral follicles, and substantially increased number of follicles with a diameter > 5mm in 365-day TGF ovaries. Antral follicles were isolated from three ovaries of different gilts, and then classified into 3 groups according to their diameter (d 1-3 mm, d 3-5mm, d>5mm). (C) Comparison of three largest follicles isolated from WT and TGF ovaries. (D) E2 concentration in follicular fluid of TGF large antral follicles was significantly lower than that in WT pre-ovulatory follicles. \* stands for P<0.05. (E) P4 concentration in follicular fluid was not significantly different between TGF and WT. Hormones in follicular fluid were measured in follicles from three 365-day ovaries of different gilts.

**Knockdown of *BMP15* caused premature luteinization and impaired oocyte quality in TGF follicles.**

We next examined the expression and activation of factors relevant to follicular development. Results firstly confirmed that BMP15 protein abundantly located in both WT oocytes and GCs of primary to pre-ovulatory follicles (Fig. 5A). Both normal and abnormal TGF follicles showed slightly decreased BMP15 protein accumulation in the less degraded GCs than WT. However, markedly reduced BMP15 expression level was noted in deteriorated oocytes of TGF abnormal (TGFA) follicles (Fig. 5A). TGS ovaries exhibited the minimum BMP15 protein level in those primary-like follicles of 110-day TGS ovaries and highly degraded SFs of 365-day TGS ovaries (Fig. 5A). Thus, we speculated that the *in vivo* *BMP15* interference efficiency

246 was different in transgenic individuals, which was likely responded for the two TG ovarian phenotypes (TGF  
247 and TGS). Besides, TGS ovaries displayed a phenotype of highly degradation, and serious inhibition of  
248 follicular development and cellular activity in the arrested SFs, exactly similar to the phenotypes of BMP15  
249 homozygotes mutations sheep(Braw-Tal et al., 1993) and women with POI(Luisi et al., 2015) , with which  
250 caused female infertility. Hence, we then chiefly focused on the effects of TGF follicles.

251 In TGF follicles, we found that the expression patterns of both GDF9 and FSHR, the BMP15 cooperator  
252 and down regulator respectively, were corresponding to BMP15 (Fig. S5 , Fig. 5A) in TGF follicles. Whenas  
253 there were no changes in expression of BMP15 receptors (ALK6 and BMPR2) (Fig. S5). Contrary to BMP15,  
254 the luteinizing hormone receptor (LHR) expressed higher in TGF follicles as compared to WT (Fig. 5A). This  
255 excess expression of LHR suggested premature luteinization in TGF follicles, which was also demonstrated  
256 by the dramatically raised expression of 3 $\beta$ HSD (3 $\beta$ -hydroxysteroid dehydrogenase) in TGF SFs (Fig.  
257 5B)(Grasa et al., 2016). In consideration of the striking features of reduced follicle number and degraded GCs  
258 in the TGF follicles, we then detected the expression levels of caspase 3 and Ki67 to assess the cell apoptosis  
259 and proliferation activity. Surprisingly, there was no change in expression of both caspase 3 and Ki67 in the  
260 degraded TGFA follicles (Fig. 5B). The later investigation of BMP15 mediated signaling pathways suggested  
261 an underlying mechanism. We emphasized that notably weakened Smad1/5/8 activity in TGFA follicles when  
262 compared to TGF normal SFs (Fig. 6A), but slighter attenuated Smad2/3 phosphorylation was shown in these  
263 abnormal follicles (Fig. 6B). It was likely that Smad1/5/8 mainly contributed to the inhibition of follicular  
264 development of the TGFA follicles, whereas Smad2/3 activated in a BMP15 independent pathway and played  
265 a role in supporting growth of these less degraded follicles. Except for GCs, we also discovered impaired  
266 oocyte quality in TGFA follicles. As showed in Fig. 5C, an undetectable level of autophagy-related protein  
267 LC3B (microtubule-associated protein 1 light chain 3)(Jiang et al., 2017) was shown in oocytes of TGFA SFs,  
268 while oocytes of WT and TGF normal follicles displayed a normal level of LC3B. This result demonstrated  
269 that autophagy activity of the oocytes of TGFA follicles was largely weakened, which was fundamental to  
270 many oocyte cellular processes(Su et al., 2017).

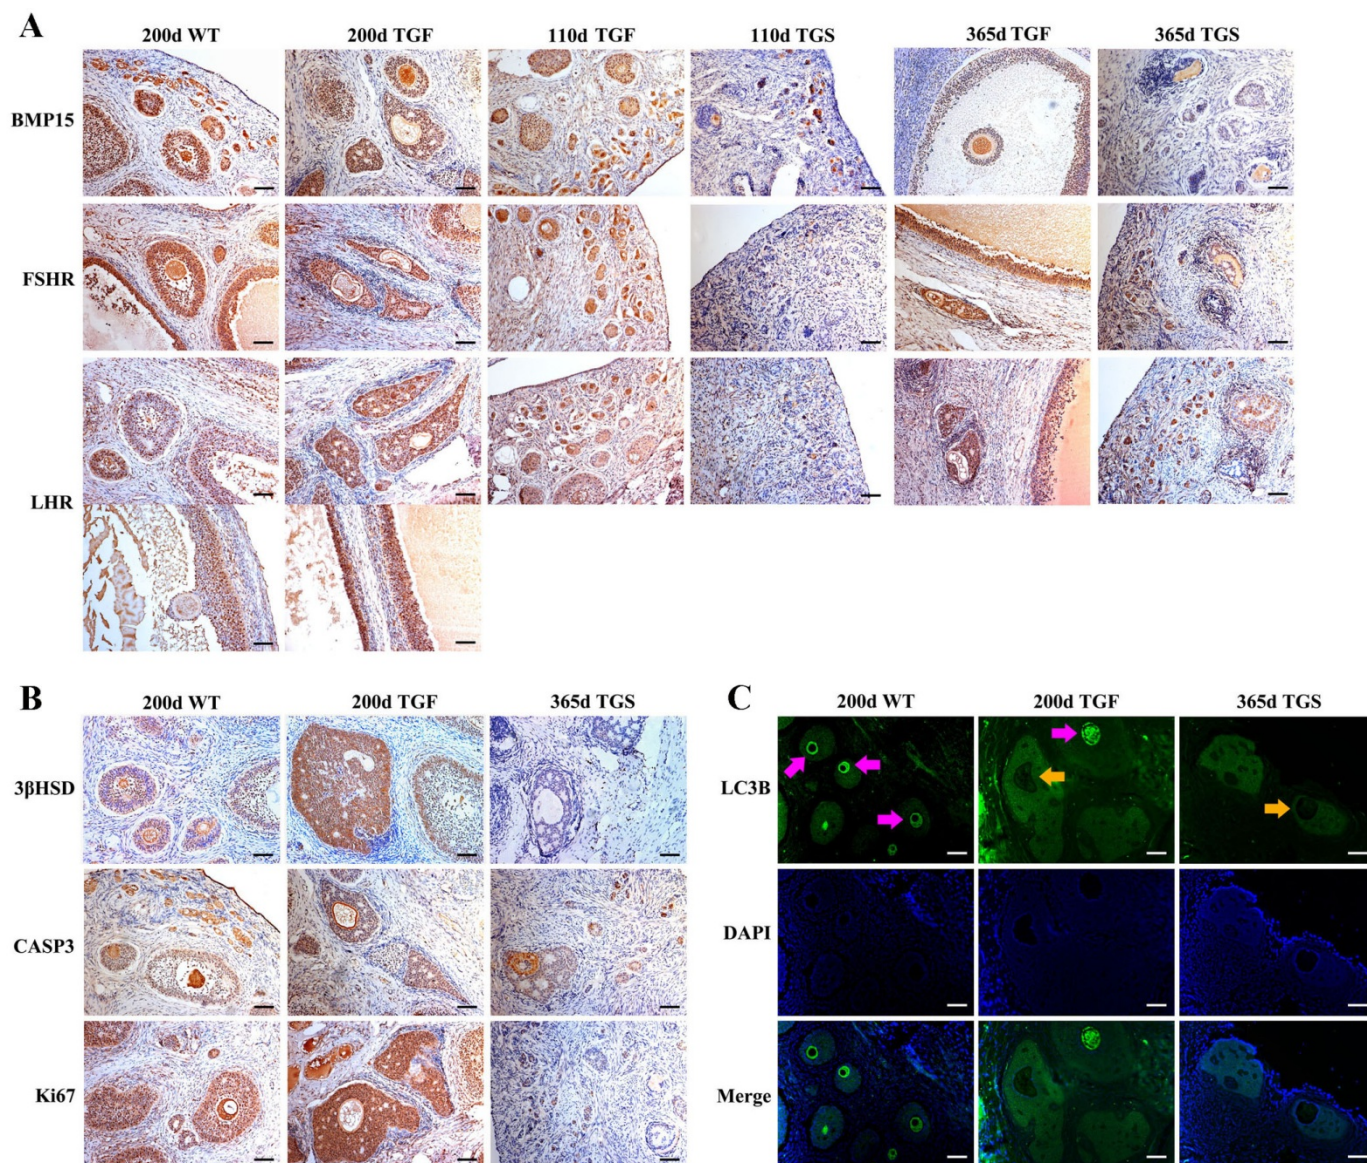

271  
272  
273 **Fig. 5. Abnormal TGF follicles showed premature luteinization and impaired oocyte quality.** (A)  
274 Immunostaining on ovarian sections indicates expression of BMP15 decreased remarkably in TGS abnormal  
275 follicles, but only slightly reduced in TGF follicles, as compared to WT follicles. FSHR shared a similar  
276 expression pattern with BMP15, the expression pattern of LHR was contrary to BMP15. It expressed higher in  
277 TGF GCs of both preantral and antral follicles. Scale bar = 100μm. (B) Follicular cell apoptosis, proliferation,  
278 and premature luteinization were evaluated by immunostaining with Caspase3, Ki67, and 3βHSD respectively.  
279 Notably higher expression level of 3βHSD was discovered in abnormal TGF follicles. However, expressions  
280 of Caspase3 and Ki67 was not significantly different between abnormal TGF follicles and WT follicles. Scale  
281 bar = 100μm. (C) Immunofluorescence images demonstrates intensive expression of autophagy-related  
282 protein LC3B in oocytes of normal follicles of TGF and WT ovary, but barely expressed LC3B in oocytes of  
283 abnormal follicles of TG (TGF and TGS) ovaries. Purple arrow, oocytes in normal follicles; Orange arrow,  
284 oocytes in abnormal follicles. Scale bar= 100μm.

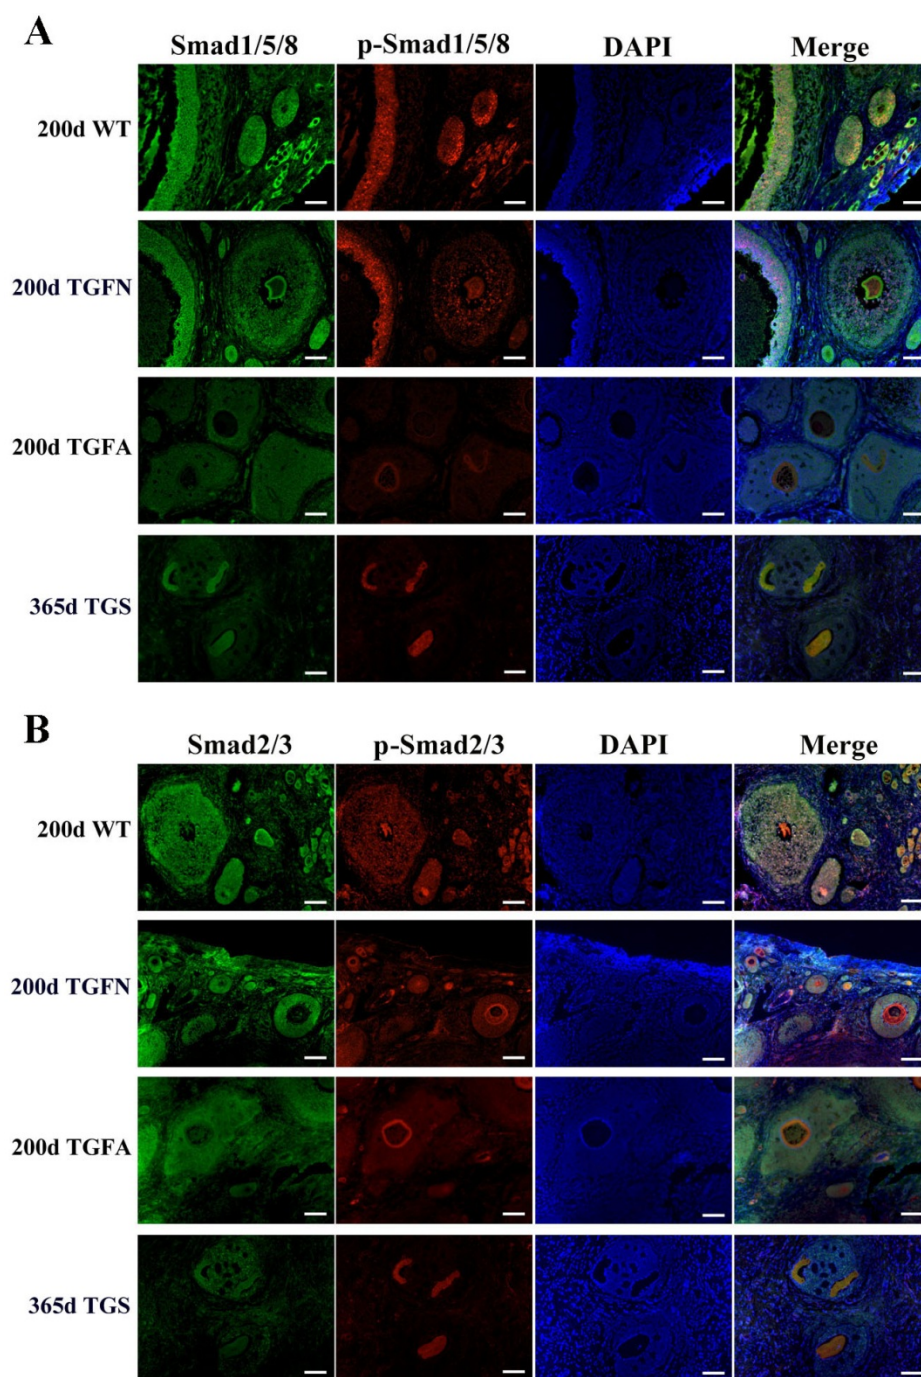

286

287

288 **Fig. 6. Smad1/5/8 signaling pathway was inhibited in abnormal follicles in TGF ovary. (A)**  
 289 Immunofluorescence images showed Smad1/5/8 pathway was evidently less activated in abnormal follicles in  
 290 TGF ovaries, and severely inhibited in highly degraded 365-day TGS follicles, as compared to that in normal  
 291 follicle of TGF and WT ovaries. **(B)** Immunofluorescence images demonstrated a mild decrease in Smad2/3  
 292 signaling in both normal and abnormal follicles of TG ovaries. Smad2/3 signaling was remarkably inhibited in  
 293 highly degraded 365-day TGS follicles. TGFN, normal follicles in TGF ovary; TGFA, abnormal follicles in  
 294 TGF ovary. Scale bar = 100 $\mu$ m.

295

## Knockdown of *BMP15* resulted in dynamic transcriptomic alteration during TGF follicular growth.

To further investigate the regulatory role of BMP15 in porcine follicular development, RNA-seq was carried out on follicles or GCs captured by laser capture microdissection (LCM) method from frozen sections of both WT and TGF ovaries. LCM-captured follicles were categorised to three stage of follicular development: primary follicle (PF), secondary follicle (SF), and small antrum follicle (SAF) stages. For large antrum follicle, only parietal granulosa and thecal cells (APC) were captured by LCM for RNA-seq. The follicles or APCs were captured from frozen sections of each 5 TGF and WT ovaries of gilts at age ranging from 60 to 170 days. The gene profiles of 34,640 genes generated by RNA-seq were used for identification of differentially expressed genes (DEGs), and GO and pathway enrichment analysis basing on intra (between each two continuous follicle stages in either WT or TGF sample) and inter (between each follicle stage of WT and TGF sample) effect comparisons (Table S6). In intra effect comparisons, the largest number of DEGs (3503 DEGs) was found in SAF<sup>WT</sup>/SF<sup>WT</sup> comparison, and the least number of DEGs (350 DEGs) was found in APC<sup>WT</sup>/SAF<sup>WT</sup> comparison (Table S6). However, in contrast to WT, during TGF follicular development, the lowest number of DEGs was found in SAF<sup>TGF</sup>/SF<sup>TGF</sup> comparison, and the largest number of DEGs was found in SF<sup>TGF</sup>/PF<sup>TGF</sup> comparison (Table S6). Striking difference of the dynamics of transcriptions between WT and TGF follicular development were also found in GO (Fig. 7A) and pathway (Fig. S7A) enrichment. In WT ovary, more DEGs was presented in enriched GO during the dynamical transition from early primary to secondary follicle stage, and from secondary to small antrum follicle stage, but less DEGs was presented in enriched GO during small antrum follicle to large antrum follicle stage transition. Whereas, in TGF ovary, more DEGs was presented in enriched GO during the dynamical transition from small antrum follicle to large antrum follicle stage, but less DEGs was presented during secondary to small antrum follicle stage transition (Fig. 7A). These results in GO enrichment were in line with that found in pathway enrichment (Fig. S7A). Based on the intra effect analysis, it seemed like that the GCs differentiation during the late secondary stage and early antrum formation (Hennet and Combelles, 2012), had been delayed during TGF follicular dynamical development. BMP15 probably played a more important role during the dynamical development of secondary and subsequent follicle stages rather than in early stages.

In consideration of the expression and function of BMP15 during follicular development were stage-specific (Paradis et al., 2009; Sun et al., 2010), we next conducted the RNA-seq data analysis based on inter effect comparisons. Both DEGs number and their clustering results revealed distinct effect on knocking down of BMP15 on each follicle stage, where the largest number of DEGs was found in the secondary follicle stage (Fig. S8A). Based on these DEGs, we enriched total 15 up-regulated and 26 down-regulated pathways (Fig. S7B) in all four follicle stages. 10 pathways were enriched during the three dynamical transitions of each two continuous follicle stages, in which DEGs were identified based on the combination of the intra and

329 inter effect comparison (Fig. S8 ). These pathways were then illustrated in Fig. 7B according to their relevant  
330 function. Interestingly, knocking down of BMP15 seemed to lead to an increase of signaling of cell growth in  
331 primary follicle, due to the significant up-regulation of Estrogen and MAPK pathways, and the  
332 down-regulation of ubiquitin protein degradation pathway. However, knocking down of BMP15 was likely to  
333 inhibit GCs proliferation and growth from secondary follicle stage onward, because of the significant  
334 down-regulation of pathways including Cell cycle, Hippo, P53, PI3K *et al*, which also implied a potential  
335 involvement of BMP15 in these pathways. Though GCs proliferation and growth were inhibited by knocking  
336 down of BMP15, the significantly up-regulated MAPK pathways in primary and secondary follicle stages, and  
337 Notch pathway in secondary and small antrum follicle stages may play a role for partial compensation on the  
338 cell proliferation and growth in preantral follicles to support the continuous development of certain percent of  
339 follicles to term. Furthermore, knocking down of BMP15 did not result in significant pathway alteration  
340 during the transition from secondary to small antrum follicle stage t (Fig. 7B). Combined with the finding of  
341 that the minimum DEGs was presented in SAF<sup>TGF</sup>/SF<sup>TGF</sup> comparison (Table S6), it suggests that knocking  
342 down of BMP15 may cause an inhibition of GCs differentiation and abnormal development in preantral  
343 follicles. In large antrum stage, DEGs involved in ovarian steroidogenesis (*Lhr*, *Cyp17*, *3βHsd et al*) were  
344 significantly up-regulated in theca cells of TGF follicles (Table S7), possible associated with the undergoing  
345 of premature luteinization of TGF follicles (Fig. 5B). Except for GCs, we also enriched significantly  
346 down-regulated DEGs involved in oocyte meiosis and maturation in TGF follicles beyond primary follicle  
347 stage, possibly related to the impaired oocyte quality (Fig. 5C).

348 Moreover, we found *in vivo* knocking down of BMP15 resulted in significant decrease of *Bmp15* expression  
349 level from primary to small antrum follicle stage (Table S8), which was confirmed by qPCR analysis (Fig. 7C).  
350 Through a correlation analysis of the DEGs, we predicted 13 downstream regulated genes of *Bmp15*, in which  
351 6 genes (*Atrx*, *Amd1*, *Dtd2 et al*) were positive correlated, and 7 genes (*Fgf9*, *Igfbp7*, *Cmpk2 et al*) were  
352 negatively correlated (Fig. S8B , Table S8). Furthermore, an unexpected significantly decreased expression of  
353 *Fshr* in TGF follicles was detected by transcriptomic analysis (Table S7), and confirmed by qPCR (Fig. 7C),  
354 which seemed to be inconsistent to the previous perspective that BMP15 played a role in suppression of *Fshr*  
355 expression (Abir and Fisch, 2011; McMahon et al., 2008; Otsuka et al., 2001; Shimizu et al., 2019). This  
356 discrepancy was probably due to species difference or the abnormal development of TGF GCs, including  
357 degradation, premature luteinization *et al*. In addition, mRNA examination revealed that *Mad211* (*Mitotic*  
358 *spindle assembly checkpoint protein*) decreased significantly in TGF ovarian tissues and antrum follicles (Fig.  
359 7C), implying the inhibition of TGF cell mitosis. Increased expression of *Mkp1* (*Dual specificity protein*  
360 *phosphatase 1*) in 60-day TGF ovarian tissues but decreased expression of this gene in 60-day TGF ovarian

361 tissues and antrum follicles (Fig. 7C) seemed to be related to the up-regulated MAPK pathway in early TGF  
 362 preantral follicles (Fig. 7B).  
 363

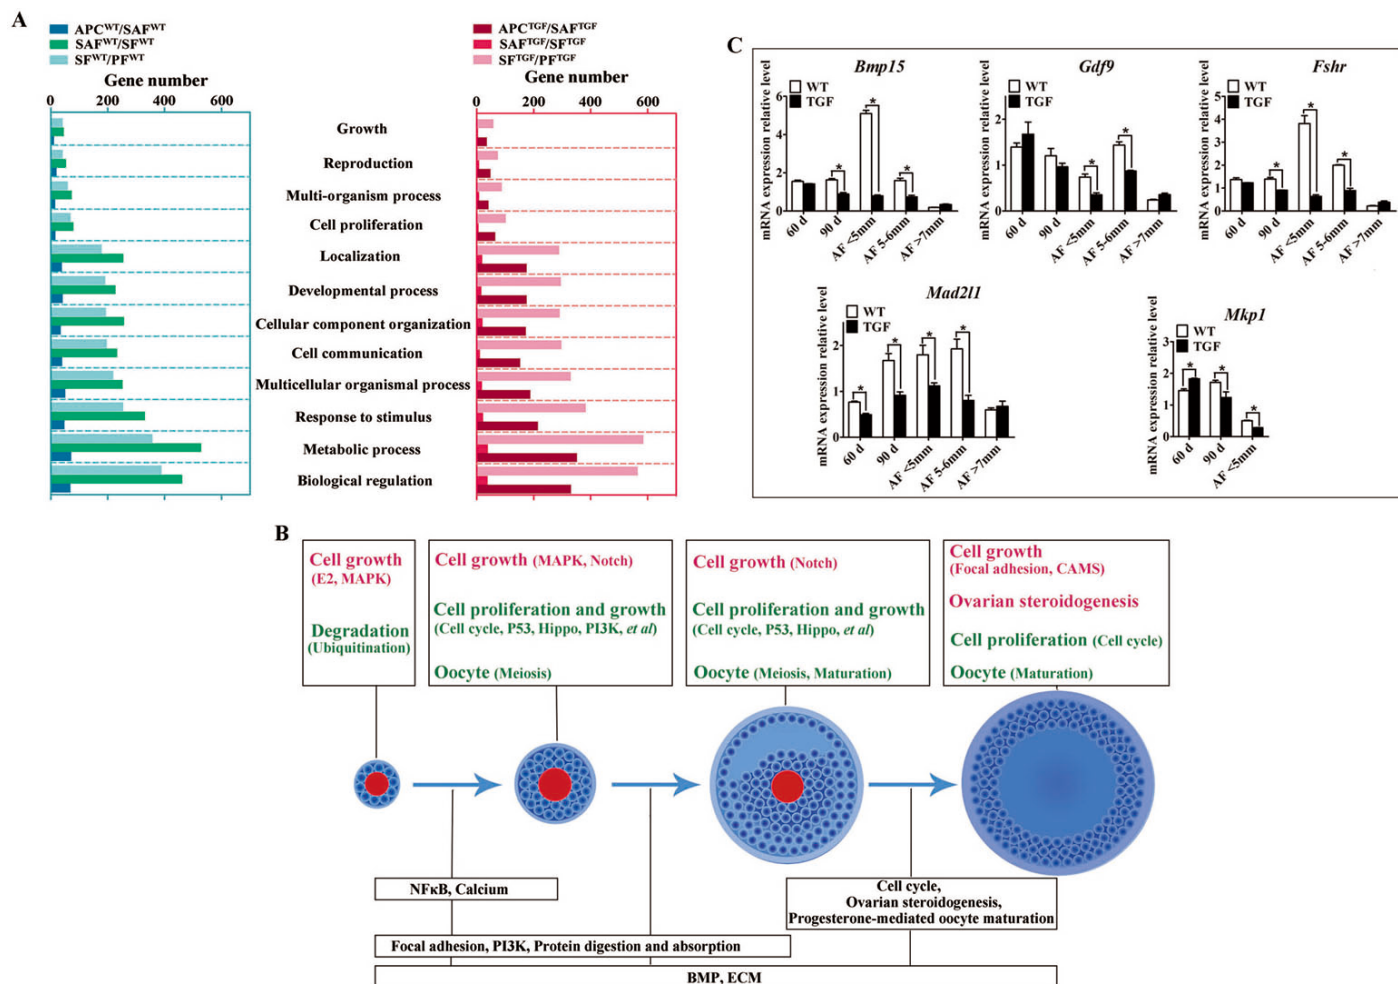

364  
 365 **Fig. 7. Altered follicle dynamic transcriptomes during TGF follicular development.** (A) Different  
 366 number of DEGs was presented in enriched 12 biological processes (GO) between WT and TGF dynamic  
 367 transcriptomes during follicular development. In TGF ovary, the least DEGs was presented in enriched GO  
 368 during the transition from secondary to small antrum follicle stage; In WT ovary, the least DEGs was  
 369 presented in enriched GO during the transition from small antrum to antral follicle transition. The most  
 370 DEGs was presented in enriched GO during the transition from primary to secondary follicle stage in TGF  
 371 ovary, whereas in WT ovary, that was presented during the transition from secondary to small antrum  
 372 follicle stage. Gene Ontology-based analysis was conducted by Webgestalt software. (B) Summary of  
 373 important pathways (based on inter effect analysis) involved in follicular development. Up-regulated  
 374 pathways are shown in red, and down-regulated pathways are shown in green. (C) A subset of DEGs was  
 375 validated by qPCR. 60 d stands for 60-day ovarian tissue, which was mainly composed of early stage follicles  
 376 (primordial, primary, and early secondary follicles). 90 d represents for 90-day ovarian tissue, which was  
 377 mainly composed of secondary follicles without antral follicles. AF<5mm, antral follicle with a diameter <5  
 378 mm. AF 5-6 mm, antral follicle with a diameter of 5-6 mm. AF>7mm, antral follicle with diameter >7 mm.



### 380 **Knockdown of *BMP15* caused reduced capacity of TGF follicles to ovulate.**

381 The evidence of disordered estrous cycle, abnormally enlarged antral follicles, and that no corpus lutein was  
 382 observed in sexually mature TG gilts until 365 days old, demonstrates that knockdown of *Bmp15* could cause  
 383 dysovulation. To investigate the underlying factors causing dysovulation by knocking down of BMP15,  
 384 COCs (oocyte-cumulus complexes) were isolated from antrum follicles with a diameter of 5-7 mm for  
 385 single-cell RNA sequencing. As expected, sequencing results showed a drastic decreased of *BMP 15* in TGF  
 386 COCs (Table 1), which was confirmed by qPCR analysis in antrum follicles (Fig. 7C). Interestingly, GDF9,  
 387 the closely related homologous protein of BMP15, was down-regulated by knocking down of BMP15 (Fig. 7C  
 388 and Table 1). However, the expressions of another BMP proteins (*Bmp4*, *Bmp6*) were not affected by knocking  
 389 down of BMP15. Surprisingly, BMP15 receptors (*Bmpr2* and *Alk6*) as well as its signaling protein *Smad8*  
 390 were significantly up-regulated, which was probably related to the increased expression of *Fst* and *Inha* or  
 391 another activin. About four-folds decreased expression of both *Fshr* and *Hsd17 $\beta$*  (Table 1 and Fig. 8C) might  
 392 contribute to the dramatically reduced E2 production and the absence of dominant follicle selection in TGF  
 393 antrum follicles. Up-regulated expression of steroidogenesis related factors including *Lhr*, *Star* (*steroidogenic*  
 394 *acute regulatory protein*), *Cyp11a* (*cytochrome P450 family 11 subfamily A member*), *Cyp19a* (*cytochrome*  
 395 *P450 family 19 subfamily A member*) (Table 1 and Fig. 8B, C) in TGF COCs was consistent with the results of  
 396 transcriptomic analysis of TGF APC (Table 7), which might contribute to the undergoing of premature  
 397 luteinization. It has been reported that the down expression of *Amhr2* (Anti-Mullerian hormone receptor type  
 398 2) and *Cx43* (Gap junction protein alpha 1) induced by LH in preovulatory follicles was important to  
 399 ovulation (Norris et al., 2008; Pierre et al., 2013). Thus the increased expression of these two genes in TGF  
 400 COCs potentially resulted in a decreased capacity of oocyte meiosis resumption and ovulation. In addition,  
 401 markedly decreased expression of oocyte quality related genes (*Bmp15*, *Gdf9*, *Zp2*, *Zp3*, *Zar1*, and *Irf6*)  
 402 strongly implied a reduced oocyte competence in TGF COCs.

403

404

**Table 1. Interest genes that related to COCs function**

| Gene s             | Log2<br>fold change | P-value | Description                     |
|--------------------|---------------------|---------|---------------------------------|
| BMPs and receptors |                     |         |                                 |
| <i>BMP15</i>       | -6.21               | <0.01   | Bone morphogenetic protein 15   |
| <i>Gdf9</i>        | -3.38               | <0.01   | Growth differentiation factor 9 |
| <i>Bmp6</i>        |                     | ns      | Bone morphogenetic protein 6    |

|                                 |       |       |                                                  |
|---------------------------------|-------|-------|--------------------------------------------------|
| <i>Bmp4</i>                     |       | ns    | Bone morphogenetic protein 4                     |
| <i>Bmpr2</i>                    | 2.37  | <0.01 | Bone morphogenetic protein receptor type II      |
| <i>Alk6</i>                     | 1.52  | <0.01 | Bone morphogenetic protein receptor type-IB      |
| Hormones and receptors          |       |       |                                                  |
| <i>Fshr</i>                     | -2.14 | <0.01 | Follicle-stimulating hormone receptor            |
| <i>Fst</i>                      | 1.12  | <0.01 | Follistatin                                      |
| <i>Pgrmc1</i>                   | 1.27  | <0.01 | Progesterone receptor membrane component 1       |
| <i>Pgrmc2</i>                   | 1.86  | <0.01 | Progesterone receptor membrane component 2       |
| <i>Inha</i>                     | 2.07  | <0.01 | Inhibin alpha                                    |
| <i>Amhr2</i>                    | 3.94  | <0.01 | Anti-Mullerian hormone receptor type 2           |
| <i>Lhr</i>                      | 5.40  | <0.01 | Luteinizing hormone/choriogonadotropin receptor  |
| <i>Esr1</i>                     | 1.55  | <0.01 | Estrogen receptor 1                              |
| <i>Esr2</i>                     |       | ns    | Estrogen receptor 2                              |
| Steroidogenesis related factors |       |       |                                                  |
| <i>Star</i>                     | 6.52  | <0.01 | Steroidogenic acute regulatory protein           |
| <i>Hsd17β7</i>                  | -2.0  | <0.01 | Hydroxysteroid 17-beta dehydrogenase 7           |
| <i>Cyp11a</i>                   | 1.19  | <0.01 | Cytochrome P450 family 11 subfamily A            |
| <i>Cyp19a</i>                   | 5.45  | <0.01 | Cytochrome P450 19A2                             |
| Oocyte quality related factors  |       |       |                                                  |
| <i>Zp2</i>                      | -2.81 | <0.01 | Zona pellucida sperm-binding protein 2 precursor |
| <i>Zp3</i>                      | -2.97 | <0.01 | Zona pellucida sperm-binding protein 3           |
| <i>Zar1</i>                     | -2.88 | <0.01 | zygote arrest 1                                  |
| <i>Irf6</i>                     | -1.7  | <0.01 | Interferon regulatory factor 6                   |
| Others                          |       |       |                                                  |
| <i>Smad8</i>                    | 3.50  | <0.01 | SMAD family member 8                             |
| <i>Igf1</i>                     | 2.40  | <0.01 | Insulin-like growth factor I                     |
| <i>Cx43</i>                     | 2.86  | <0.01 | Gap junction protein alpha 1                     |

405

406 Total 2,820 DEGs (885 up-regulated, 1,935 down-regulated) was generated for pathway enrichment. The  
407 significantly up-regulated AMPK (Fig. 8A, C) and Ovarian steroidogenesis (Fig. 8A, B) pathways were likely

408 to contribute to the greater number of large antrum follicles in TGF ovaries, according to the findings of  
 409 previous studies in sheep(Foroughinia et al., 2017) and sow(Knox, 2005). However, pathways (Cell cycle,  
 410 P53 *et al*) involved in cell proliferation and growth, were significantly down-regulated (Fig. 8A, B), which  
 411 was consistent with the results of the dynamic transcriptomic analysis of TGF follicles (Fig. S7B).  
 412 Furthermore, four pathways including oocyte meiosis, oocyte maturation, cell cycle, and ovarian  
 413 steroidogenesis, which were closely involved in regulation of oocyte maturation and ovulation, presented a  
 414 DEGs enrichment more than 20% (Fig. 8A,B). In total, these results revealed both impaired function of  
 415 cumulus cells and oocyte maturation in TGF COCs, suggesting a reduced capacity to ovulate.

416 However, surprisingly, the expression of *Impdh* (*Inosine monophosphate dehydrogenase 2*) and *Npr2*  
 417 (*Natriuretic peptide receptor 2*) was not affected (Fig. 8D and Table S9). These two genes have been reported  
 418 in mice to be up-regulated by BMP15 and GDF9 during the activation of maturation promoting factor (MPF)  
 419 (Cyclin B and CDK1) and stimulation of oocyte meiotic resumption *in vitro*(Wigglesworth et al., 2013).  
 420 Instead, we discovered significantly decreased expression of *Cyclin B* and *Cdk1* (Cyclin dependent kinase 1)  
 421 in TGF follicles from secondary stage onward (Fig. 8D and Table S9), which implies the involvement of  
 422 BMP15 in modulating porcine oocyte meiosis possibly through regulating the expression of MPF.

423

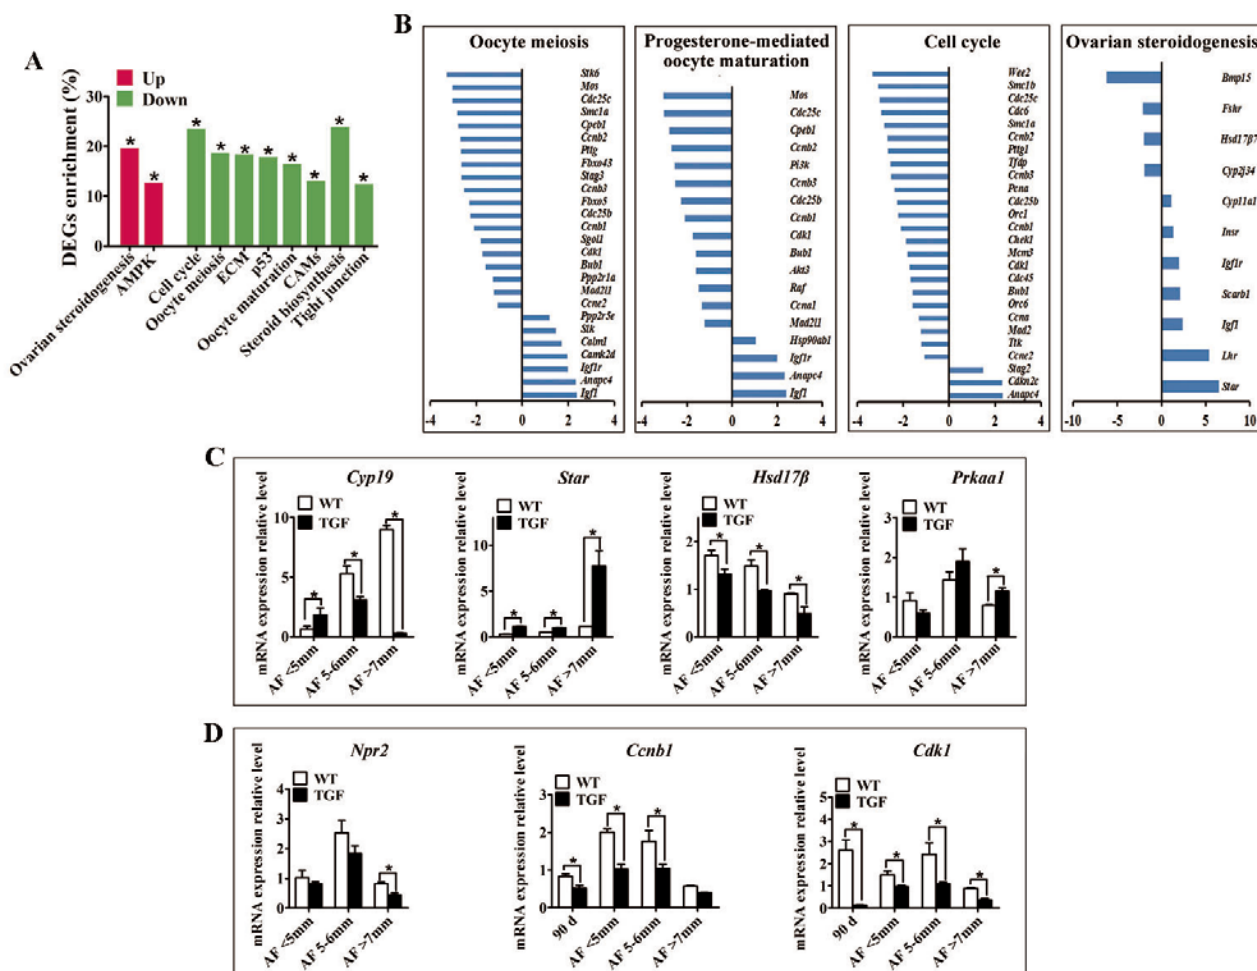

424

425 **Fig. 8. Single cell RNA-seq on TGF COCs showed affected process in ovulation.** (A) Pathway enrichment  
426 revealed two significantly up-regulated pathways which potentially contributed to increased number of large  
427 antral follicles, and 8 significantly down-regulated pathways that are involved in cumulus cell function and  
428 oocyte maturation. (B) Pathways of Oocyte meiosis, Progesterone-mediated oocyte maturation, Ovarian  
429 steroidogenesis, and Cell cycle, which are closely related to oocyte maturation and ovulation, showed DEGs  
430 enrichment of 22.4%, 21.2%, 25.5%, 22.6% respectively. (C) qPCR validation of mRNA expression level of  
431 DEGs involved in the pathways of Ovarian steroidogenesis (*Cyp19*, *Star*, *Hsd17 $\beta$* ) and AMPK (*Prkaa1*). (D)  
432 Quantification of mRNA level of genes related to oocyte meiosis indicated decreased expression of MPF, but  
433 unaffected expression of *Npr2* during TGF follicular development. 90 d represents for 90-day ovarian tissues.

434

## 435 Discussion

436 The effect of BMP15 mutations on altering ovarian follicular development and ovulation rate was firstly  
437 discovered in Inverdale (FecX) sheep(Braw-Tal et al., 1993; Davis et al., 1992; Smith et al., 1997). In these  
438 sheep, ewes with single allele of inactive *BMP15* gene showed increased ovulation rate and a higher  
439 incidence of twin or triplet births, while ewes with bi-alleles of inactive *BMP15* gene were sterile with  
440 primary ovarian failure phenotype(Galloway et al., 2000). Studies on animals immunized with different  
441 regions of BMP15 peptide revealed that an increased ovulation rate can be found in females with BMP15  
442 being partially neutralized, but an inhibition of follicular growth and ovulation was found in females with  
443 vast majority of active BMP15 being neutralized(McNatty et al., 2007). Therefore, different extent of  
444 reduction of biologically active BMP15 protein level seems to lead to varied effect on fertility. In this study,  
445 we found two different ovarian phenotypes (TGS and TGF) in our *BMP15* knockdown gilts. The different  
446 ovarian phenotypes might be caused by different *in vivo* expression level of BMP15.Indeed, in TGS ovaries,  
447 the marked reduced level of both BMP15 mRNA (Fig. 1E) and protein (Fig. 5A) revealed that the majority  
448 of BMP15 was knockdown by integrated shRNA. In contrast, in TGF ovaries, the BMP15 protein  
449 accumulated abundantly, and was only slightly lower than that in WT ovaries (Fig. 5A), despite the mRNA  
450 level of BMP15 had decreased to the half of wild-type as detected in 365-day (Fig. 1E) and 30-day (Fig. 1F,  
451 G ) ovarian tissues. Therefore, the less interference of BMP15 expression in TGF ovaries may confer them a  
452 less severely impaired ovarian phenotype, as TGF ovaries contained each stage of follicle, but presented  
453 remarkably reduced follicle number, increased ratio of abnormal follicle, disordered reproductive hormones,  
454 and ovulation dysfunction. We found that TGF and TGS ovaries could concurrently appear in single TG  
455 gilts (Fig. 3A). The difference in *in vivo* interference efficiency of integrated shRNA plasmid between  
456 bilateral ovaries in single TG individual may be caused by unknown complicated regulatory mechanism of  
457 transgene expression, possibly including epigenetic factors.

458 Previous reports in sheep revealed that heterozygous mutations in BMP15 had been proved to inhibit  
459 GCs growth but increase GCs sensitivity to FSH, leading to increased ovulation of smaller matured follicles  
460 with reduced amounts of E2 and inhibin (Fabre et al., 2006a; Otsuka et al., 2001; Otsuka et al., 2000;  
461 Shackell et al., 1993). However, this was inconsistent to our results. As the *in vivo* mRNA level of BMP15  
462 in TGF ovaries was knocked down to half of wild-type in TG gilts, thus these TG gilts with TGF ovaries  
463 could be considered as pigs with heterozygous mutations in BMP15. In different to ewes heterozygous for  
464 mutations in BMP15, our TG gilts did not present increased ovulation rate, but in contrast, a dysfunction in  
465 ovulation, as corpus lutein can not be found in TGF ovaries from TG gilts of age younger than 365 days,  
466 though they can be observed in TGF ovaries from TGF gilts at age of 400 and 500 days (Fig. S4A),  
467 indicating a delayed ovulation in TGF gilts. In addition, significantly decreased amount of total and smaller  
468 antral follicles in TGF ovaries (Fig. 4A, B) seemed incapable to support an increased ovulation rate.  
469 Moreover, the appearance of abnormally enlarged antral follicles with lower FSHR expression level and E2  
470 production (Fig. 4) may indicate that TGF follicles couldn't ovulate at normal size probably due to the  
471 attenuated FSH sensitivity and a lack of dominant follicle selection in TG gilts. Besides, premature  
472 luteinization of GCs possibly caused by insufficient FSH stimulation also may contribute to the dysovulation  
473 of TGF gilts. Thus, these results in TGF puberty gilts were also different from the poly-ovulatory *Bmp15*<sup>-/-</sup>  
474 mice, which showing normal follicular development and could ovulate at puberty (Yan et al., 2001). Hence,  
475 we may suggest the importance of BMP15 in regulating ovulation was species-specific different, that not  
476 only between mono- and poly-ovulatory mammals, but also between poly-ovulatory species.

477 BMP15 has been proved to suppress *Fshr* expression in GCs to affect GCs proliferation and  
478 steroidogenesis in antral follicles of rodent (McMahon et al., 2008; Otsuka et al., 2001) and human (Abir and  
479 Fisch, 2011; Shimizu et al., 2019). Previous studies on sheep indicated that heterozygous mutations in BMP15  
480 could increase the sensitivity of GCs in antral follicle to FSH stimulation, leading to increased ovulation  
481 rate (Fabre et al., 2006a). However, a recent study showed that treatment with BMP15 caused increased  
482 expression of *Fshr* in bovine preantral follicles after 12 days culturing (Passos et al., 2013). These conflicting  
483 reports probably caused by species-specific differences and the different response to BMP15 stimulation in  
484 each follicular development stages. In this study, we found that, in different to the results found in sheep,  
485 knockdown of *BMP15* did not increase but significantly inhibited *Fshr* expression in both preantral and  
486 antral follicles (Fig. 7E, Table 1, Table S7). Furthermore, the findings of inhibition in GCs proliferation and  
487 differentiation, increased expression of genes involved in steroidogenesis (*StAR*, *Cyp11a*, *3βHSD*) (Fig. 5B,  
488 8C, Table 1, Table S7), drastically decreased of E2 production (Fig. 4D), subsequent absence of dominant  
489 follicle selection in the TGF follicles, were likely to be consequences of the declined sensitivity of GCs to  
490 FSH. Suppression of *FSHR* expression in preantral follicles of TG gilts implies that BMP15 could stimulate

491 porcine follicle growth and development in an earlier follicle stage rather than gonadotropin dependent  
492 period(Mori, 2016). Given the degradation of GCs and abnormal structure GCs layers observed in TGF  
493 ovaries, another possible reason for the decreased expression of FSHR might be related to the impaired GCs  
494 development caused by BMP15 deficiency.

495 As a paracrine and autocrine factor of oocyte, BMP15 can promote not only the development of follicular  
496 somatic cells, but also the development of oocyte itself. Studies on the oocyte *in vitro* maturation have  
497 demonstrated BMP15 were capable to stimulate cumulus cell expansion(Braw-Tal et al., 1993; Lin et al., 2014;  
498 Peng et al., 2013; Sudiman et al., 2014; Sugiura et al., 2010), promote signalings of LH-induced maturation of  
499 the cumulus-oocyte complex(Su et al., 2010), improve oocyte quality(Caixeta et al., 2013; Hussein et al.,  
500 2006), and increase blastocyst rate and embryonic development of fertilized oocytes(Gode et al., 2011; Wu et  
501 al., 2007). Recently, the expression level of BMP15 has been suggested as a diagnostic marker of oocyte  
502 quality(Wu et al., 2007). In this study, we confirmed the important role of BMP15 in porcine oocyte  
503 development *in vivo*. We found that knockdown of BMP15 could cause oocyte degeneration or abnormal  
504 enlargement (Fig. 3G, H), and lacked of normal autophagy activity in oocytes of abnormal preantral follicles  
505 (Fig. 5G). Further transcriptomic analysis of the follicle and COCs also implies genes and pathways  
506 involved in oocyte meiosis and maturation were affected in TGF follicles from secondary stage onward (Fig.  
507 7B, 8A). Previous studies have indicated possible underlying mechanisms of BMP15 in regulating oocyte  
508 meiosis. One study considered that BMP15 and GDF9 can promote oocyte meiotic resumption in mice  
509 through up-regulation of *Npr2* and *Impdh*(Wigglesworth et al., 2013). Another study showed that inhibiting  
510 BMP15 signaling pathway by Smad2/3 phosphorylation inhibitor resulted in significantly decreased  
511 expression of *Cdc2* and *Cyclinb1* during porcine oocyte *in vitro* maturation(Lin et al., 2014). However, our  
512 transcriptomic results showed that the expression level of *Npr2* and *Impdh* both were not affected in both  
513 TGF follicles and COCs, instead, expression level of MPF (*Cdc2* and *Cyclinb1*) decreased significantly (Fig.  
514 8D and Table S9). Therefore, our results might support an underlying mechanism of BMP15 involved in  
515 porcine oocyte meiosis and maturation through regulating the expression of MPF, however, this requires  
516 further studies to elucidate.

517 In summary, knockdown of *BMP15* caused markedly reduced fertility of TG gilts mainly through  
518 inhibition of both GCs and oocyte development (Fig. 9). The suppression of GCs proliferation and  
519 differentiation led to decline in number of early follicles, GCs degradation, and reduced sensitivity of GCs to  
520 FSH stimulation with consequence of premature luteinization, higher LHR expression, but lower E2  
521 production in large antral follicles. The effect on oocyte development directly led to impaired oocyte quality  
522 and oocyte meiotic maturation. Consequently, large antral follicles abnormally enlarged resulting in  
523 dysovulation and disordered reproductive cycle hormones. Our results revealed a remarkable physiological

524 suppression of porcine ovarian follicular development and ovulation in *BMP15* knockdown gilts,  
 525 demonstrating an essential role of BMP15 on porcine female reproduction, and providing new insights into  
 526 the regulatory role of BMP15 in poly-ovulatory mammals. Our findings provided important implications on  
 527 further investigation of the complicated regulatory function of BMP15 in female fertility of poly-ovulatory  
 528 species, and development of possible strategies for improving porcine female fertility through modulation of  
 529 BMP15 expression.

530

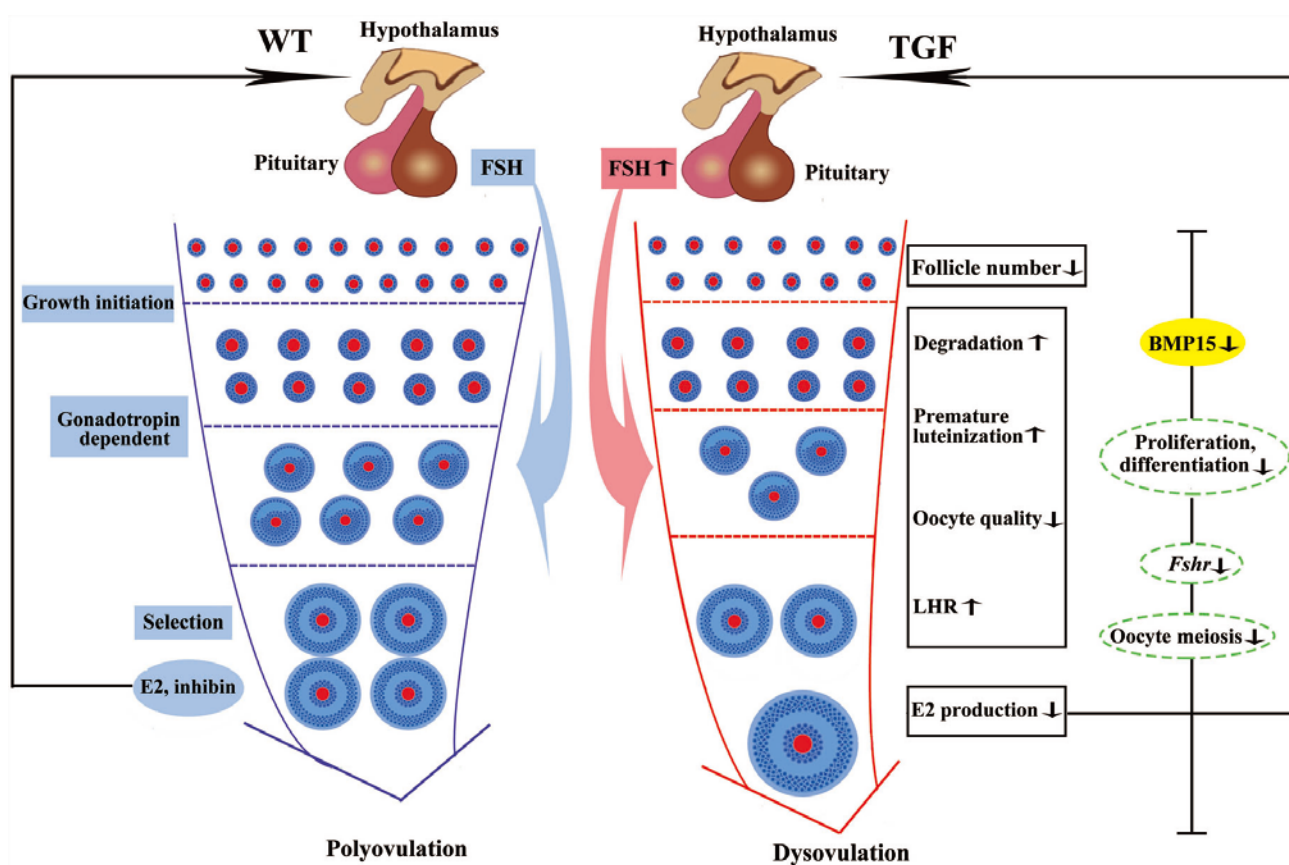

531

532

533 **Fig. 9. Summary of biological functions and possible regulatory mechanism of BMP15 in TGF**  
 534 **follicular development.** As compared to WT gilt, knocking down of BMP15 caused remarkable follicle  
 535 number reduction during the TGF follicular developmental process, accompanied by impaired oocyte quality,  
 536 degradation, and premature luteinization in TGF preantral follicles, which may leads to increased expression  
 537 of LHR and dramatically decreased E2 production in TGF antral follicles, resulting in lack of dominant  
 538 follicle selection but abnormally enlarged antral follicles, presenting an dysovulation phenotype. Decreased  
 539 E2 production in TGF antral follicles may have a negative feedback to pituitary to increase the expression of  
 540 *Fsh*. However, the decreased expression of *Fsh* receptor *Fshr* in GCs beyond primary follicle stage by  
 541 knocking down of BMP15 may attenuate its function on stimulation the growth of antral follicles. In addition,  
 542 knocking down of BMP15 leads to inhibition in cell proliferation and differentiation, declined of oocyte  
 543 quality and meiotic maturation during the TGF follicular development, these together contributes to the

544 appearance of enlarged follicle in TGF ovary and dysovulation. Colored ellipses represent results based on  
545 morphological observation and molecular examination. Dotted ellipses represent results based on the  
546 transcriptomic analysis.

## 547 **Methods**

548 **Construction of shRNA expression vectors and evaluation of shRNA interference efficiency.** Five  
549 shRNAs (Table S1) targeting to porcine *Bmp15* mRNA was designed and selected by Invitrogen's web-based  
550 siRNA design software (<https://rnaidesigner.invitrogen.com/rnaiexpress/>). Human U6 promoter followed by  
551 each shRNA sequence was individually synthesized (Sangon Biotech, China), and cloned downstream of the  
552 EGFP expression cassette on pEGFP-N1 vector (Takara Bio, USA) to generate each pEGFP-*Bmp15*-shRNA  
553 expression vector (Fig. 1A). Meanwhile, a scramble shRNA expression vector generated as negative control.  
554 To evaluate the RNA interference efficiency of shRNA, porcine *Bmp15* CDS was synthesized (Sangon  
555 Biotech, China), and cloned into psiCheck II vector (Promega, USA) to generate psiCheck II -*Bmp15* plasmid.  
556 Each pEGFP-*Bmp15*-shRNA plasmid then was respectively co-transfected with psiCheck II -*Bmp15* plasmid  
557 into HEK293 cells. After 48 h culturing, transfected cells were collected, and subjected to RNA interference  
558 efficiency detection by using a dual-luciferase reporter system (Promega, USA). The shRNA with most  
559 efficient RNA interference efficiency then was selected for generation of BMP15 knockdown pig model.

560  
561 **Generation of *Bmp15* knockdown pig model.** Procedures for generation of the *Bmp15* knockdown gilts  
562 were illustrated in Fig. S1. Briefly, the selected pEGFP-*Bmp15* shRNA plasmid was transfected into PEFs  
563 derived from a male Yorkshire pig. After G418 selection and fluorescence examination, EGFP positive PEFs  
564 were used as donor cells for somatic cell nuclear transfer (SCNT). For SCNT, oocytes were recovered by  
565 aspirating ovaries collected from abattoir with a 20 G needle connected to syringe, and then cultured in  
566 HEPES-buffered tissue culture medium 199 and later maturation medium, until *in vitro* maturation. SCNT by  
567 handmade cloning and embryo transplantation were carried out by BGI Ark Biotechnology company, China.  
568 After 114 days of pregnancy, we obtained two surviving F0 generation *Bmp15* knockdown transgenic (TG)  
569 males. Then we mated one TG boar with wild-type sows through artificial insemination (AI), and obtained F1  
570 generation TG gilt for this study. Sibling gilts without pEGFP-*Bmp15*-shRNA integration were used as  
571 controls (WT) in this study. The protocol of animal study was approved by the Institutional Animal Care and  
572 Use Committee (IACUC), Sun Yat-sen University (Approval Number: IACUC-DD-16-0901).

573  
574 **Tissue collection.** A total of 54 animals including 25 WT and 29 TG gilts were sacrificed at ages of 30 to 500  
575 days. Among these TG gilts, 6 gilts contained 8 TGS ovaries at age of 110, 160, 200 and 365 days. Tissues



of ovary, pituitary, muscle, liver, kidney, heart and uterus were collected. Tissues used for RNA extraction were directly soaked in Trizol reagent (Promega) and frozen in liquid nitrogen quickly. Muscle tissues used for DNA extraction together with the 30-day ovarian tissues used for protein detection, were directly frozen in liquid nitrogen before transported to the laboratory. All the other ovaries were washed in sterilized saline water and photographed. Some of them were weighed later. Each 6 ovaries at age of 60 and 90 days were used for ovarian tissues mRNA detection. And each six 365-day ovaries of WT and TGF gilts were used for ovarian tissues and isolated follicle mRNA detection respectively. Primers for qPCR analysis were shown in Table S3. 10 ovaries (5 WT and 5 TGF) at age of 60 to 170 days were frozen in OCT and stored at -80°C before laser capture microdissection (LCM). Six ovaries (3 WT and 3 TGF) from different 365-day gilts were used for dissection and follicular fluid collection. Each 3 WT and TGF 365-day ovaries were used for COCs collection and later single-cell sequencing. The rest ovaries (24 WT, 24 TGF and 8 TGS) at age of 30 to 400 days were used for HE observation and IHC analysis, they were fixed in 10% (w/v) paraformaldehyde / 0.02 M PBS (pH 7.2) on ice before transportation to the laboratory.

**Identification and characterization of transgenic gilts.** Transgenic pigs were first screened by GFP fluorescence on toes under sunlight, and confirmed by PCR analysis (Table S2) of the integration of pEGFP-*Bmp15* shRNA plasmid in genome using genomic DNA extracted from muscle tissues. The copy number of integrated plasmid was determined by qPCR and Southern blot analysis. mRNA expression level of *Bmp15* in transgenic pigs was detected by qPCR in 365-day ovaries, and BMP15 protein level was detected by Western blot analysis of 30-day ovarian tissues.

**F1 gilts estrous checking and hormone assays.** About 50 F1 TG gilts at age of 170 to 400 days were checked daily for signs of oestrus in the presence of an intact mature boar. Each two TG and WT gilts at age about 365 days were chosen for daily vaginal smears analysis, and daily jugular venous blood collection at 9:00 to 11:00 AM for 24 days continuously. Vaginal cell smears analysis and estrous identification were performed as described in a previous report (Mayor et al., 2007). Daily blood samples were centrifuged at 1500 g for 15 min, then the serum samples were collected and stored at -80°C. These serum samples were thawed on the ice in prior to be used for quantification of the concentration of oestradiol (E2) and progesterone (P4) by chemiluminescence immunoassay (CLIA) (Siemens, Germany).

**Histological examination.** Ovaries derived from gilts at age of 30 to 400 days were fixed in 10% (w/v) paraformaldehyde with 0.02 MPBS (pH 7.2) at 4 °C for about 2 h. Then were cut vertical slices in about 0.5 cm thickness and fixed in fresh 10% (w/v) paraformaldehyde until total 24 h. These slices were mounted in

610 paraffin, and serially cut into 5  $\mu\text{m}$ -thick sections at last by Rotary Microtome (MICROM, Germany), and  
611 stained with hematoxylin and eosin (HE). Ovarian HE sections were observed and photographed under a  
612 fluorescent microscope (Zeiss, Germany).

613 Immunohistochemistry (IHC) detection was performed by using the anti-Rabbit HRP-DAB Cell and  
614 tissue staining kit (R&D, CTS005) and anti-Goat HRP-DAB Cell and tissue staining kit (R&D, CTS008).  
615 Immunohistofluorescence examination was performed by using TSA plus Fluorescein (Perkinelemer,  
616 NEL741001KT) and Cyanine3.5 (Perkinelemer, NEL763001KT) kit. Antibodies of BMP15 (Eterlife,  
617 EL166380), GDF9 (Eterlife, EL910881), FSHR (Eterlife, EL912710), LHR (Eterlife, EL904141), Caspase3  
618 ( Abcam, ab13847),  $3\beta\text{HSD}$  (Abcam, ab154385), p-Smad1/5 (CST, 9516 ), Ki67(Abcam, ab15580) and  
619 LC3B (Arigo, ARG55799) were diluted 1:100 with PBS. While -other antibodies including ALK6 (Santa cruz,  
620 sc5679), BMPR2(Santa cruz, sc5683), Smad2/3 (Santa cruz, sc8332), Smad1/5/8 (Santa cruz, sc6031R), and  
621 p-Smad2/3 (Santa cruz, sc11769) were diluted 1:50 in PBS.

622  
623 **Ovary dissection and follicular fluid collection.** Each three 365-day TGF and WT ovaries derived from  
624 different individuals, were flushed with sterilized saline water and placed in the incubator at  $38^{\circ}\text{C}$  during  
625 transportation to the lab. Later, visible antral follicles in these ovaries were dissected by scalpel blade and  
626 tweezers, and classified into 3 groups (1–3 mm, 3–5 mm,  $>5\text{mm}$ ) according to their diameter, which was  
627 measured by a vernier caliper. Total follicle number of each group was counted. Then, follicular fluid from  
628 antral follicles with diameter of 3-5mm and diameter  $>5\text{mm}$  were collected by a dispensable 10 mL syringe.  
629 The concentrations of FSH, LH, E2, and P4 in follicular fluid were quantified by the CLIA method (Siemens,  
630 Germany).

631  
632 **Laser capture microdissection (LCM).** A total of 10 ovaries from each five WT and TGF gilts at age of 60 to  
633 170 days, were embedded in OCT and placed on a cryostat (MICROM, HM560, Germany). All ovaries were  
634 cut into 7  $\mu\text{m}$ -thick sections and mounted on RNase free membrane slides (MMI, 50102). These membrane  
635 slides then were fixed in ice-cold 95% ethanol for 1 min, and later washed in 75% ethanol for 30 sec.  
636 Afterward, sections were stained following the methods as previously reported(Golubeva et al., 2013). Briefly,  
637 staining mixture was prepared with 1% cresyl violet in absolute ethyl alcohol, EosinY, RNase free water, and  
638 100% ethanol at the ratio of 3:1:4:4. Membrane slides were stained in this fresh staining mixture for 30 sec,  
639 then dehydrated through 100% ethanol 1 min three times, and followed 30 s incubation in xylene. Slides were  
640 finally dried for 5 min by a hair dryers blowing cold wind, and stored at  $-80^{\circ}\text{C}$  until used.

641 The follicles were distinguished from each other as follows: primary follicle (PF) was defined by a clear  
642 monolayer of cuboidal granulosa cells; secondary follicle (SF) was defined by more than two layers of

643 granulosa cells but without any antrum; small antrum follicle (SAF) was defined by obvious small antrum but  
644 not completely separated granulosa and cumulus cells; antral follicle (AF) was characterized by a big single  
645 central antrum and completely separated granulosa and cumulus cell layers. Entire PF, SF, and SAF, but only  
646 parietal granulosa and theca cells of AF (named APC) were isolated by LCM. Each types of follicle on 10  
647 sections of each ovary were dissected under 20× magnification microscopic visualization using MMI Cell Cut  
648 Plus system (MMI, Swiss). Later, the dissections were treated with 100 μL of TRK Lysis buffer of the  
649 MicroElute total RNA kit (Omega) and 2 μL 2-mercaptoethanol. Both TGF and WT lysates were respectively  
650 mixed according to their follicle stage after 10 min lysis at room temperature, and stored on dry ice until RNA  
651 extraction. A total of 8 LCM-derived RNA samples, including PF<sup>WT</sup>, SF<sup>WT</sup>, SAF<sup>WT</sup>, APC<sup>WT</sup>, PF<sup>TGF</sup>, SF<sup>TGF</sup>,  
652 SAF<sup>TGF</sup>, APC<sup>TGF</sup>, were used for transcriptomic analysis. RNA-seq was performed on an Illumina HiSeq2000  
653 using Illumina TruSeq SBS kit v2 (209 cycles including index) to obtain paired-end reads (2×100 bp).

654  
655 **Single-cell RNA sequencing on COCs.** COCs were aspirated from large antral follicles (diameter about 5-7  
656 mm) of each three 365-day TGF and WT ovaries derived from different gilts by using a 20-gauge needle fixed  
657 to a 10 mL disposable syringe. COCs then were pooled respectively, and placed on a stereomicroscope  
658 (Nikon). Those COCs with several layers of cumulus cells and uniform cytoplasm were selected. Each 10  
659 selected COCs from TGF and WT ovaries was used for RNA micro-extraction by MicroElute total RNA kit  
660 (Omega). Total RNA was pre-amplified by SMARTer® Ultra™ Low RNA Kit (Clontech), and sequenced on  
661 Illumina Hiseq 2000 sequencing system.

662  
663 **Analysis of RNA-Seq data.** Raw RNA-Seq clean reads were obtained by removing reads containing low  
664 quality reads and/or adaptor sequences from raw reads and mapped to the pig genome (*Sus scrofa* 10.2),  
665 allowing up to two base mismatches. Differential expression analysis was performed using the Benjamini  
666 approach, genes with an adjusted P value < 0.05 and | log2  
667 expressed (DEGs). DEGs lists were submitted to the databases of Novogene company (China) for further  
668 enrichment analysis. GO analysis was performed by Webgestalt software. In all tests, P values were calculated  
669 using the Benjamini-corrected modified Fisher's exact test, and P < 0.05 was taken as a threshold of  
670 significance. Venn diagrams were drawn using the web tool  
671 (<http://bioinformatics.psb.ugent.be/webtools/Venn/>). Gene co-expression analysis declared correlation  
672 coefficient at 0.98 as the threshold value. Closely correlated genes then were imported in cytoscape software  
673 to generate the co-expression network.

674  
675 **Acknowledgements**

This work was jointly supported by National Transgenic Major Program (2016ZX08006003-006), National Key R&D Program of China (2018YFD0501200), Natural Science Foundation of Guangdong Province (2016A030313310).

### Ethics approval

All procedures were performed in strict accordance with the recommendations of the Guide for the Care and Use of Laboratory Animals of the National Institutes of Health. The protocol was approved by the Institutional Animal Care and Use Committee (IACUC), Sun Yat-sen University (Approval Number: IACUC-DD-16-0901).

### Competing interests

The authors declare that they have no competing interests.

### Reference

- Abir, R., Fisch, B. (2011). Invited commentary: a single nucleotide polymorphism in BMP15 is associated with high response to controlled ovarian hyperstimulation. *Reprod Biomed Online* **23**, 77-80.
- Abir, R., Fisch, B., Johnson, M.H. (2014). BMP15, fertility and the ovary. *Reprod Biomed Online* **29**, 525-526.
- Al-ajoury, R., Kassem, E., Al-halabi, B., Moassess, F., Al-achkar, W. (2015). Investigation of some genetic variations in BMP15 accompanied with premature ovarian failure (POF) in Syrian women. *Middle East Fertility Society Journal* **20**, 91-96.
- Braw-Tal, R., McNatty, K., Smith, P., Heath, D., Hudson, N., Phillips, D., McLeod, B., Davis, G. (1993). Ovaries of ewes homozygous for the X-linked Inverdale gene (FecX1) are devoid of secondary and tertiary follicles but contain many abnormal structures. *Biology of reproduction* **49**, 895-907.
- Caixeta, E.S., Sutton-McDowall, M.L., Gilchrist, R.B., Thompson, J.G., Price, C.A., Machado, M.F., Lima, P.F., Buratini, J. (2013). Bone morphogenetic protein 15 and fibroblast growth factor 10 enhance cumulus expansion, glucose uptake, and expression of genes in the ovulatory cascade during in vitro maturation of bovine cumulus-oocyte complexes. *Reproduction* **146**, 27-35.
- Chand, A.L., Ponnampalam, A.P., Harris, S.E., Winship, I.M., Shelling, A.N. (2006). Mutational analysis of BMP15 and GDF9 as candidate genes for premature ovarian failure. *Fertil Steril* **86**, 1009-1012.
- Chang, H.M., Cheng, J.C., Klausen, C., Leung, P.C. (2013). BMP15 suppresses progesterone production by down-regulating StAR via ALK3 in human granulosa cells. *Mol Endocrinol* **27**, 2093-2104.
- Clement, F., Monniaux, D. (2013). Multiscale modelling of ovarian follicular selection. *Prog Biophys Mol Biol* **113**, 398-408.
- Davis, G.H., McEwan, J.C., Fennessy, P.F., Dodds, K.G., McNatty, K.P., O, W.-S. (1992). Infertility due to bilateral ovarian hypoplasia in sheep homozygous (FecX1 FecX1) for the Inverdale prolificacy gene located on the X chromosome. *Biology of reproduction* **46**, 636-640.
- Fabre, S., Pierre, A., Mulsant, P., Bodin, L., Di Pasquale, E., Persani, L., Monget, P., Monniaux, D. (2006a). Regulation of ovulation rate in mammals: contribution of sheep genetic models. *Reprod Biol Endocrinol* **4**, 20.
- Fabre, S., Pierre, A., Mulsant, P., Bodin, L., Di Pasquale, E., Persani, L., Monget, P., Monniaux, D. (2006b). Regulation of ovulation rate in mammals: contribution of sheep genetic models. *Reproductive Biology and Endocrinology* **4**, 20.
- Foroughinia, G., Fazileh, A., Eghbalsaid, S. (2017). Expression of genes involved in BMP and estrogen signaling and AMPK production can be important factors affecting total number of antral follicles in ewes. *Theriogenology* **91**, 36-43.
- Galloway, S.M., McNatty, K.P., Cambridge, L.M., Laitinen, M.P., Juengel, J.L., Jokiranta, T.S., McLaren, R.J., Luero, K., Dodds, K.G., Montgomery, G.W. (2000). Mutations in an oocyte-derived growth factor gene (BMP15) cause increased ovulation rate and infertility in a dosage-sensitive manner. *Nature genetics* **25**, 279.

717 **Gilchrist, R.B., Lane, M., Thompson, J.G.** (2008). Oocyte-secreted factors: regulators of cumulus cell function and oocyte quality.  
718 *Hum Reprod Update* **14**, 159-177.

719 **Gode, F., Gulekli, B., Dogan, E., Korhan, P., Dogan, S., Bige, O., Cimrin, D., Atabey, N.** (2011). Influence of follicular fluid GDF9  
720 and BMP15 on embryo quality. *Fertil Steril* **95**, 2274-2278.

721 **Golubeva, Y., Salcedo, R., Mueller, C., Liotta, L.A., Espina, V.** (2013). Laser capture microdissection for protein and NanoString  
722 RNA analysis. *Methods Mol Biol* **931**, 213-257.

723 **Grasa, P., Sheikh, S., Krzys, N., Millar, K., Janjua, S., Nawaggi, P., Williams, S.A.** (2016). Dysregulation of follicle development in  
724 a mouse model of premature ovarian insufficiency. *Reproduction* **152**, 591-601.

725 **Hashimoto, O., Moore, R.K., Shimasaki, S.** (2005). Posttranslational processing of mouse and human BMP-15: potential  
726 implication in the determination of ovulation quota. *Proceedings of the National Academy of Sciences* **102**, 5426-5431.

727 **Hennet, M.L., Combelles, C.M.** (2012). The antral follicle: a microenvironment for oocyte differentiation. *Int J Dev Biol* **56**,  
728 819-831.

729 **Hussein, T.S., Froiland, D.A., Amato, F., Thompson, J.G., Gilchrist, R.B.** (2005). Oocytes prevent cumulus cell apoptosis by  
730 maintaining a morphogenic paracrine gradient of bone morphogenetic proteins. *J Cell Sci* **118**, 5257-5268.

731 **Hussein, T.S., Thompson, J.G., Gilchrist, R.B.** (2006). Oocyte-secreted factors enhance oocyte developmental competence. *Dev*  
732 *Biol* **296**, 514-521.

733 **Jiang, C., Diao, F., Sang, Y.J., Xu, N., Zhu, R.L., Wang, X.X., Chen, Z., Tao, W.W., Yao, B., Sun, H.X., Huang, X.X., Xue, B., Li, C.J.**  
734 (2017). GGPP-Mediated Protein Geranylgeranylation in Oocyte Is Essential for the Establishment of Oocyte-Granulosa Cell  
735 Communication and Primary-Secondary Follicle Transition in Mouse Ovary. *PLoS Genet* **13**, e1006535.

736 **Juengel, J.L., Hudson, N.L., Berg, M., Hamel, K., Smith, P., Lawrence, S.B., Whiting, L., McNatty, K.P.** (2009). Effects of active  
737 immunization against growth differentiation factor 9 and/or bone morphogenetic protein 15 on ovarian function in cattle.  
738 *Reproduction* **138**, 107-114.

739 **Juengel, J.L., Hudson, N.L., Heath, D.A., Smith, P., Reader, K.L., Lawrence, S.B., O'Connell, A.R., Laitinen, M.P., Cranfield, M.,**  
740 **Groome, N.P., Ritvos, O., McNatty, K.P.** (2002). Growth differentiation factor 9 and bone morphogenetic protein 15 are  
741 essential for ovarian follicular development in sheep. *Biol Reprod* **67**, 1777-1789.

742 **Juengel, J.L., Hudson, N.L., Whiting, L., McNatty, K.P.** (2004). Effects of immunization against bone morphogenetic protein 15  
743 and growth differentiation factor 9 on ovulation rate, fertilization, and pregnancy in ewes. *Biol Reprod* **70**, 557-561.

744 **Juengel, J.L., Proctor, L.E., Wearne, K., Olliver, D., Hudson, N.L., Jensen, D., Davis, G.H., Johnstone, P.D., McNatty, K.P.** (2013).  
745 Effects of immunization against androstenedione or bone morphogenetic protein 15 (BMP15) on reproductive performance in  
746 sheep. *J Anim Sci* **91**, 5946-5953.

747 **Juengel, J.L., Quirke, L.D., Lun, S., Heath, D.A., Johnstone, P.D., McNatty, K.P.** (2011). Effects of immunizing ewes against bone  
748 morphogenetic protein 15 on their responses to exogenous gonadotrophins to induce multiple ovulations. *Reproduction* **142**,  
749 565-572.

750 **Knox, R.V.** (2005). Recruitment and selection of ovarian follicles for determination of ovulation rate in the pig. *Domest Anim*  
751 *Endocrinol* **29**, 385-397.

752 **Liao, W.X., Moore, R.K., Otsuka, F., Shimasaki, S.** (2003). Effect of intracellular interactions on the processing and secretion of  
753 bone morphogenetic protein-15 (BMP-15) and growth and differentiation factor-9. Implication of the aberrant ovarian  
754 phenotype of BMP-15 mutant sheep. *J Biol Chem* **278**, 3713-3719.

755 **Lin, Z.L., Li, Y.H., Xu, Y.N., Wang, Q.L., Namgoong, S., Cui, X.S., Kim, N.H.** (2014). Effects of growth differentiation factor 9 and  
756 bone morphogenetic protein 15 on the in vitro maturation of porcine oocytes. *Reprod Domest Anim* **49**, 219-227.

757 **Liu, X., Liu, H., Wang, M., Li, R., Zeng, J., Mo, D., Cong, P., Liu, X., Chen, Y., He, Z.** (2019). Disruption of the ZBED6 binding site in  
758 intron 3 of IGF2 by CRISPR/Cas9 leads to enhanced muscle development in Liang Guang Small Spotted pigs. *Transgenic research*  
759 **28**, 141-150.

760 **Luisi, S., Orlandini, C., Regini, C., Pizzo, A., Vellucci, F., Petraglia, F.** (2015). Premature ovarian insufficiency: from pathogenesis  
761 to clinical management. *J Endocrinol Invest* **38**, 597-603.

762 **Mayor, P., Galvez, H., Guimaraes, D.A., Lopez-Gatius, F., Lopez-Bejar, M.** (2007). Serum estradiol-17beta, vaginal cytology and  
763 vulval appearance as predictors of estrus cyclicity in the female collared peccary (Tayassu tajacu) from the eastern Amazon  
764 region. *Anim Reprod Sci* **97**, 165-174.

765 **McMahon, H.E., Hashimoto, O., Mellon, P.L., Shimasaki, S.** (2008). Oocyte-specific overexpression of mouse bone  
766 morphogenetic protein-15 leads to accelerated folliculogenesis and an early onset of acyclicity in transgenic mice. *Endocrinology*  
767 **149**, 2807-2815.

768 **McNatty, K.P., Hudson, N.L., Whiting, L., Reader, K.L., Lun, S., Western, A., Heath, D.A., Smith, P., Moore, L.G., Juengel, J.L.**  
769 (2007). The effects of immunizing sheep with different BMP15 or GDF9 peptide sequences on ovarian follicular activity and  
770 ovulation rate. *Biol Reprod* **76**, 552-560.

771 **McNatty, K.P., Juengel, J.L., Reader, K.L., Lun, S., Myllymaa, S., Lawrence, S.B., Western, A., Meerasahib, M.F., Mottershead,**  
772 **D.G., Groome, N.P., Ritvos, O., Laitinen, M.P.** (2005). Bone morphogenetic protein 15 and growth differentiation factor 9  
773 co-operate to regulate granulosa cell function. *Reproduction* **129**, 473-480.

774 **Monestier, O., Servin, B., Auclair, S., Bourquard, T., Poupon, A., Pascal, G., Fabre, S.** (2014). Evolutionary origin of bone  
775 morphogenetic protein 15 and growth and differentiation factor 9 and differential selective pressure between mono- and  
776 polyovulating species. *Biol Reprod* **91**, 83.

777 **Moore, R.K., Otsuka, F., Shimasaki, S.** (2003). Molecular basis of bone morphogenetic protein-15 signaling in granulosa cells. *J*  
778 *Biol Chem* **278**, 304-310.

779 **Moore, R.K., Shimasaki, S.** (2005). Molecular biology and physiological role of the oocyte factor, BMP-15. *Mol Cell Endocrinol*  
780 **234**, 67-73.

781 **Mori, T.** (2016). Regulatory Principles of Follicular Development, *Ovarian Stimulation Protocols*, pp. 1-16.

782 **Mottershead, D.G., Harrison, C.A., Mueller, T.D., Stanton, P.G., Gilchrist, R.B., McNatty, K.P.** (2013). Growth differentiation  
783 factor 9:bone morphogenetic protein 15 (GDF9:BMP15) synergism and protein heterodimerization. *Proc Natl Acad Sci U S A* **110**,  
784 E2257.

785 **Noguchi, M., Yoshioka, K., Itoh, S., Suzuki, C., Arai, S., Wada, Y., Hasegawa, Y., Kaneko, H.** (2010). Peripheral concentrations of  
786 inhibin A, ovarian steroids, and gonadotropins associated with follicular development throughout the estrous cycle of the sow.  
787 *Reproduction* **139**, 153-161.

788 **Norris, R.P., Freudzon, M., Mehlmann, L.M., Cowan, A.E., Simon, A.M., Paul, D.L., Lampe, P.D., Jaffe, L.A.** (2008). Luteinizing  
789 hormone causes MAP kinase-dependent phosphorylation and closure of connexin 43 gap junctions in mouse ovarian follicles:  
790 one of two paths to meiotic resumption. *Development* **135**, 3229-3238.

791 **Otsuka, F., Yamamoto, S., Erickson, G.F., Shimasaki, S.** (2001). Bone morphogenetic protein-15 inhibits follicle-stimulating  
792 hormone (FSH) action by suppressing FSH receptor expression. *J Biol Chem* **276**, 11387-11392.

793 **Otsuka, F., Yao, Z., Lee, T., Yamamoto, S., Erickson, G.F., Shimasaki, S.** (2000). Bone morphogenetic protein-15. Identification of  
794 target cells and biological functions. *J Biol Chem* **275**, 39523-39528.

795 **Paradis, F., Novak, S., Murdoch, G.K., Dyck, M.K., Dixon, W.T., Foxcroft, G.R.** (2009). Temporal regulation of BMP2, BMP6,  
796 BMP15, GDF9, BMPR1A, BMPR1B, BMPR2 and TGFBR1 mRNA expression in the oocyte, granulosa and theca cells of developing  
797 preovulatory follicles in the pig. *Reproduction* **138**, 115-129.

798 **Passos, M.J., Vasconcelos, G.L., Silva, A.W., Brito, I.R., Saraiva, M.V., Magalhaes, D.M., Costa, J.J., Donato, M.A., Ribeiro, R.P.,**  
799 **Cunha, E.V., Peixoto, C.A., Campello, C.C., Figueiredo, J.R., van den Hurk, R., Silva, J.R.** (2013). Accelerated growth of bovine  
800 preantral follicles in vitro after stimulation with both FSH and BMP-15 is accompanied by ultrastructural changes and increased  
801 atresia. *Theriogenology* **79**, 1269-1277.

802 **Paulini, F., Melo, E.O.** (2011). The role of oocyte-secreted factors GDF9 and BMP15 in follicular development and oogenesis.  
803 *Reprod Domest Anim* **46**, 354-361.

804 **Peng, J., Li, Q., Wigglesworth, K., Rangarajan, A., Kattamuri, C., Peterson, R.T., Eppig, J.J., Thompson, T.B., Matzuk, M.M.**  
805 (2013). Growth differentiation factor 9:bone morphogenetic protein 15 heterodimers are potent regulators of ovarian functions.  
806 *Proc Natl Acad Sci U S A* **110**, E776-785.

807 **Pierre, A., Peigne, M., Grynberg, M., Arouche, N., Taieb, J., Hesters, L., Gonzales, J., Picard, J.Y., Dewailly, D., Fanchin, R.,**  
808 **Catteau-Jonard, S., di Clemente, N.** (2013). Loss of LH-induced down-regulation of anti-Mullerian hormone receptor expression  
809 may contribute to anovulation in women with polycystic ovary syndrome. *Hum Reprod* **28**, 762-769.

810 **Pulkki, M.M., Mottershead, D.G., Pasternack, A.H., Muggalla, P., Ludlow, H., van Dinther, M., Myllymaa, S., Koli, K., ten Dijke,**  
811 **P., Laitinen, M., Ritvos, O.** (2012). A covalently dimerized recombinant human bone morphogenetic protein-15 variant identifies  
812 bone morphogenetic protein receptor type 1B as a key cell surface receptor on ovarian granulosa cells. *Endocrinology* **153**,  
813 1509-1518.

814 **Reader, K.L., Heath, D.A., Lun, S., McIntosh, C.J., Western, A.H., Littlejohn, R.P., McNatty, K.P., Juengel, J.L.** (2011). Signalling  
815 pathways involved in the cooperative effects of ovine and murine GDF9+BMP15-stimulated thymidine uptake by rat granulosa  
816 cells. *Reproduction* **142**, 123-131.

817 **Reader, K.L., Mottershead, D.G., Martin, G.A., Gilchrist, R.B., Heath, D.A., McNatty, K.P., Juengel, J.L.** (2016). Signalling  
818 pathways involved in the synergistic effects of human growth differentiation factor 9 and bone morphogenetic protein 15.  
819 *Reprod Fertil Dev* **28**, 491-498.

820 **Shackell, G., Hudson, N., Heath, D., Lun, S., Shaw, L., Condell, L., Blay, L., McNatty, K.** (1993). Plasma gonadotropin  
821 concentrations and ovarian characteristics in Inverdale ewes that are heterozygous for a major gene (FecX1) on the X  
822 chromosome that influences ovulation rate. *Biology of reproduction* **48**, 1150-1156.

823 **Shimizu, K., Nakamura, T., Bayasula, Nakanishi, N., Kasahara, Y., Nagai, T., Murase, T., Osuka, S., Goto, M., Iwase, A., Kikkawa,  
824 F.** (2019). Molecular mechanism of FSHR expression induced by BMP15 in human granulosa cells. *J Assist Reprod Genet* **36**,  
825 1185-1194.

826 **Smith, P., O, W., Corrigan, K., Smith, T., Lundy, T., Davis, G., McNatty, K.** (1997). Ovarian Morphology and Endocrine  
827 Characteristics of Female Sheep Fetuses that are Heterozygous or Homozygous for the Inverdale Prolificacy Gene (fecX'. *Biology  
828 of reproduction* **57**, 1183-1192.

829 **Soede, N.M., Langendijk, P., Kemp, B.** (2011). Reproductive cycles in pigs. *Anim Reprod Sci* **124**, 251-258.

830 **Su, Y.-Q., Sugiura, K., Li, Q., Wigglesworth, K., Matzuk, M.M., Eppig, J.J.** (2010). Mouse oocytes enable LH-induced maturation  
831 of the cumulus-oocyte complex via promoting EGF receptor-dependent signaling. *Molecular Endocrinology* **24**, 1230-1239.

832 **Su, Y., Wu, J., He, J., Liu, X., Chen, X., Ding, Y., Zhang, C., Chen, W., Wang, Y., Gao, R.** (2017). High insulin impaired ovarian  
833 function in early pregnant mice and the role of autophagy in this process. *Endocrine journal*, E16-0494.

834 **Su, Y.Q., Sugiura, K., Wigglesworth, K., O'Brien, M.J., Affourtit, J.P., Pangas, S.A., Matzuk, M.M., Eppig, J.J.** (2008). Oocyte  
835 regulation of metabolic cooperativity between mouse cumulus cells and oocytes: BMP15 and GDF9 control cholesterol  
836 biosynthesis in cumulus cells. *Development* **135**, 111-121.

837 **Sudiman, J., Sutton-McDowall, M.L., Ritter, L.J., White, M.A., Mottershead, D.G., Thompson, J.G., Gilchrist, R.B.** (2014). Bone  
838 morphogenetic protein 15 in the pro-mature complex form enhances bovine oocyte developmental competence. *PLoS One* **9**,  
839 e103563.

840 **Sugiura, K., Su, Y.Q., Diaz, F.J., Pangas, S.A., Sharma, S., Wigglesworth, K., O'Brien, M.J., Matzuk, M.M., Shimasaki, S., Eppig,  
841 J.J.** (2007). Oocyte-derived BMP15 and FGFs cooperate to promote glycolysis in cumulus cells. *Development* **134**, 2593-2603.

842 **Sugiura, K., Su, Y.Q., Li, Q., Wigglesworth, K., Matzuk, M.M., Eppig, J.J.** (2010). Estrogen promotes the development of mouse  
843 cumulus cells in coordination with oocyte-derived GDF9 and BMP15. *Mol Endocrinol* **24**, 2303-2314.

844 **Sun, R.Z., Lei, L., Cheng, L., Jin, Z.F., Zu, S.J., Shan, Z.Y., Wang, Z.D., Zhang, J.X., Liu, Z.H.** (2010). Expression of GDF-9, BMP-15  
845 and their receptors in mammalian ovary follicles. *J Mol Histol* **41**, 325-332.

846 **Wigglesworth, K., Lee, K.B., O'Brien, M.J., Peng, J., Matzuk, M.M., Eppig, J.J.** (2013). Bidirectional communication between  
847 oocytes and ovarian follicular somatic cells is required for meiotic arrest of mammalian oocytes. *Proc Natl Acad Sci U S A* **110**,  
848 E3723-3729.

849 **Wu, Y.T., Tang, L., Cai, J., Lu, X.E., Xu, J., Zhu, X.M., Luo, Q., Huang, H.F.** (2007). High bone morphogenetic protein-15 level in  
850 follicular fluid is associated with high quality oocyte and subsequent embryonic development. *Hum Reprod* **22**, 1526-1531.

851 **Yan, C., Wang, P., DeMayo, J., DeMayo, F.J., Elvin, J.A., Carino, C., Prasad, S.V., Skinner, S.S., Dunbar, B.S., Dube, J.L.** (2001).  
852 Synergistic roles of bone morphogenetic protein 15 and growth differentiation factor 9 in ovarian function. *Molecular  
853 endocrinology* **15**, 854-866.

854 **Yoshino, O., McMahon, H.E., Sharma, S., Shimasaki, S.** (2006). A unique preovulatory expression pattern plays a key role in the  
855 physiological functions of BMP-15 in the mouse. *Proceedings of the National Academy of Sciences* **103**, 10678-10683.

856 **Zhai, B., Liu, H., Li, X., Dai, L., Gao, Y., Li, C., Zhang, L., Ding, Y., Yu, X., Zhang, J.** (2013). BMP15 prevents cumulus cell apoptosis  
857 through CCL2 and FBN1 in porcine ovaries. *Cell Physiol Biochem* **32**, 264-278.

858  
859  
860  
861  
862

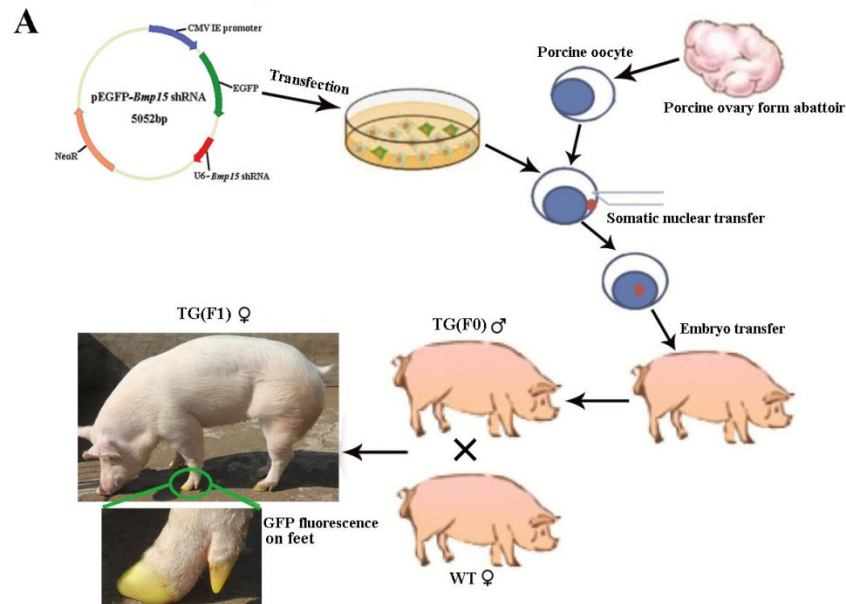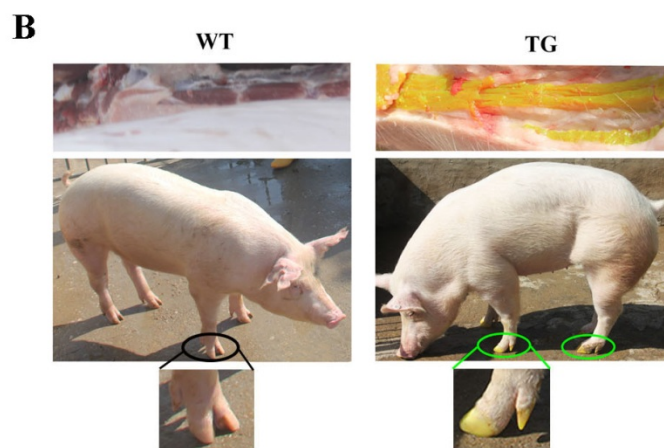

863  
 864 **Fig. S1. Schematic diagram of generation of the *Bmp15* knockdown pig, and identification of transgenic**  
 865 **pigs through EGFP fluorescent signal.** (A) Firstly, we transfected the constructed pEGFP-*Bmp15* shRNA  
 866 plasmid into Yorkshire PEFs. Then these transfected PEFs were screened with G418 cultured and  
 867 fluorescence selection to prepare donor cells for somatic cell nuclear transfer (SCNT). Later, we recovered  
 868 the recipient porcine oocytes by aspirated ovaries from the abattoir. SCNT and subsequent embryo transfer  
 869 into Large White sow were followed the operation procedure of BGI Ark Biotechnology, China. We at last  
 870 obtained two healthy neonatal F0 generation transgenic males. One TG boar was mated with wild-type sows  
 871 to generate F1 gilts. Both F0 and F1 TG pigs showed visible intense GFP fluorescence on toes while subjected  
 872 to sunlight. (B) TG gilts showed remarkable visible GFP fluorescence in muscle and toes under sunlight.



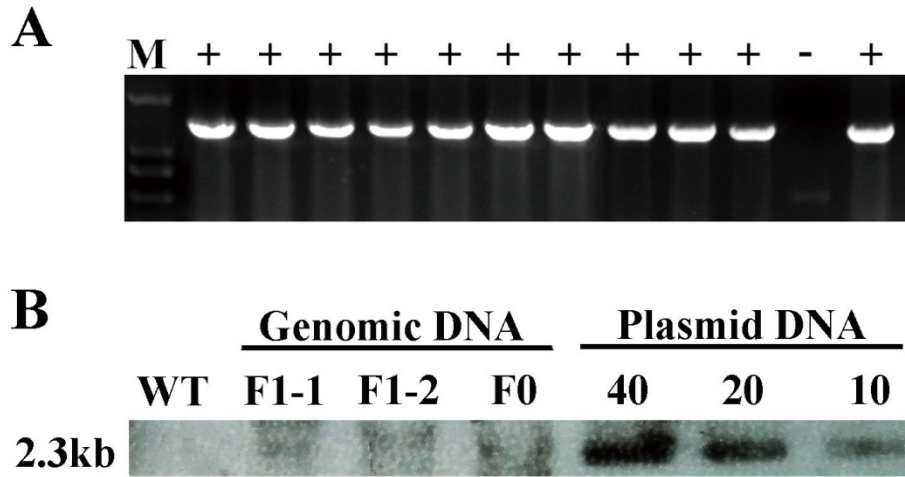

873

874

875

876

877

878

879

880

881

882

**Fig. S2. pEGFP-*Bmp15* shRNA plasmid was integrated in genome of TG F0 boar and inherited to TG F1 gilts.** (A) PCR analysis of the muscle tissue proved that pEGFP-*Bmp15* shRNA plasmid had been transmitted to F1 gilts. +, TG gilt; -, WT gilt; M, DNA Maker. (B) Southern blot analysis showed slightly less than 10 copies of constructed plasmids integrated in both F0 and F1 TG pigs, which was consistent with the result of about 7 copies of qPCR analysis (data not shown). DNA with pEGFP-*Bmp15* shRNA plasmid copies of 10, 20, and 40 were used as the positive control.

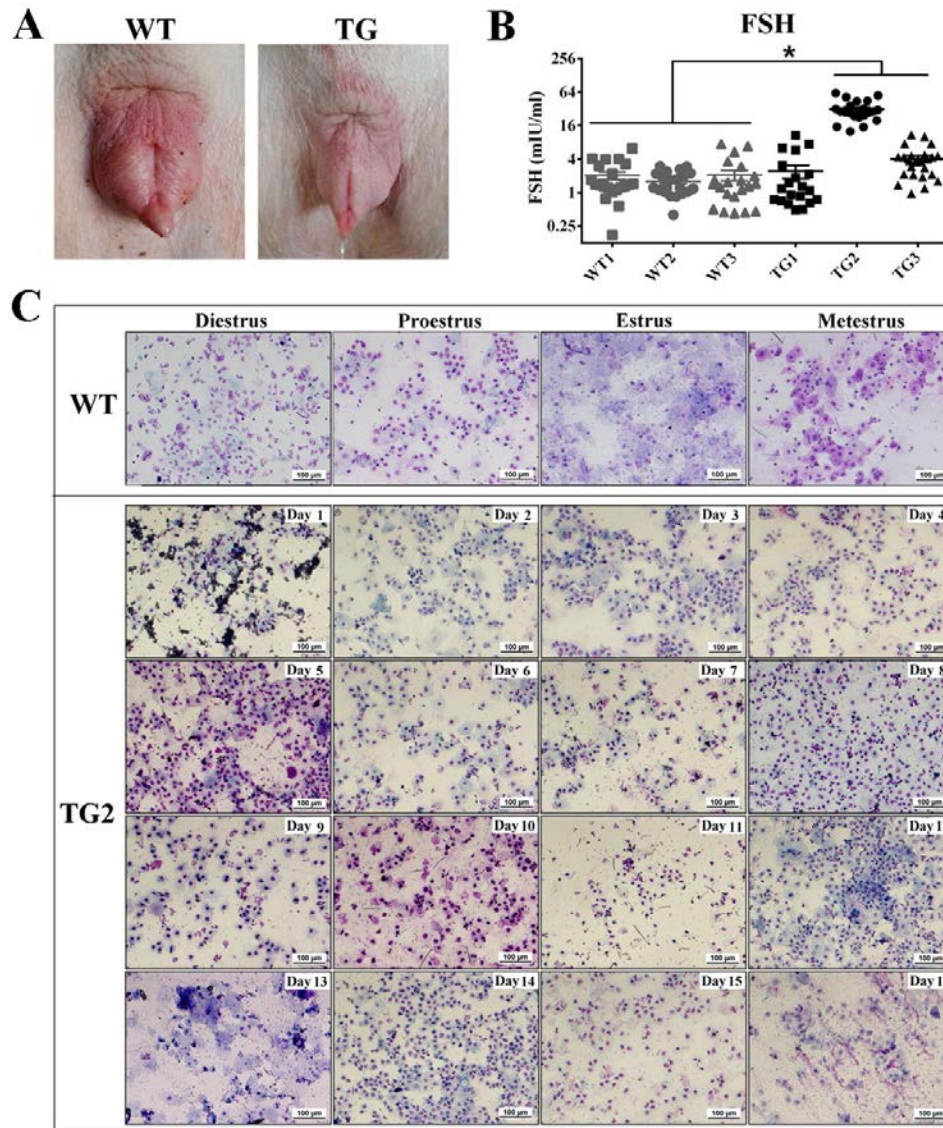

883

884 **Fig. S3. TG gilts didn't show obvious vulvar appearance change and typical cytologic changes through**  
 885 **the estrous cycle, but presented higher FSH concentration in serum. (A)** Vulvar appearance change  
 886 (increased redness and swelling) was observed in WT gilt at estrous period, but not observed in 365-day old  
 887 TG gilts, though they were daily induced by an intact mature boar since 170 days old. **(B)** Two of the three  
 888 365-day TG gilts showed higher serum FSH concentration. Serum FSH concentration was measured at a 24h  
 889 interval for 24 days. **c** Estrous cycle was evaluated by vaginal smears cytology analysis of the 365-day gilts. It  
 890 was divided into 4 distinct stages according to the appearance and the relative proportions of leucocytes, basal,  
 891 parabasal, and superficial cells. In WT gilts, proestrus, estrus, metestrus, and diestrus stage were clearly  
 892 determined through the Giemsa-stained vaginal smears. However, TG gilts presented disordered estrous  
 893 stages. Taking a view on the consecutive 16 days of vaginal smears images of TG2, the cell type of day 13  
 894 displayed a predominance of cornified enucleate epithelial cells, which was similar to WT representative cell  
 895 type of estrous stage. But the cell types of day 14 and 15 were similar to the diestrus or proestrus stage due to  
 896 the predominance of parabasal cells and few cornified superficial cells. Scale bar= 100 µm.

897

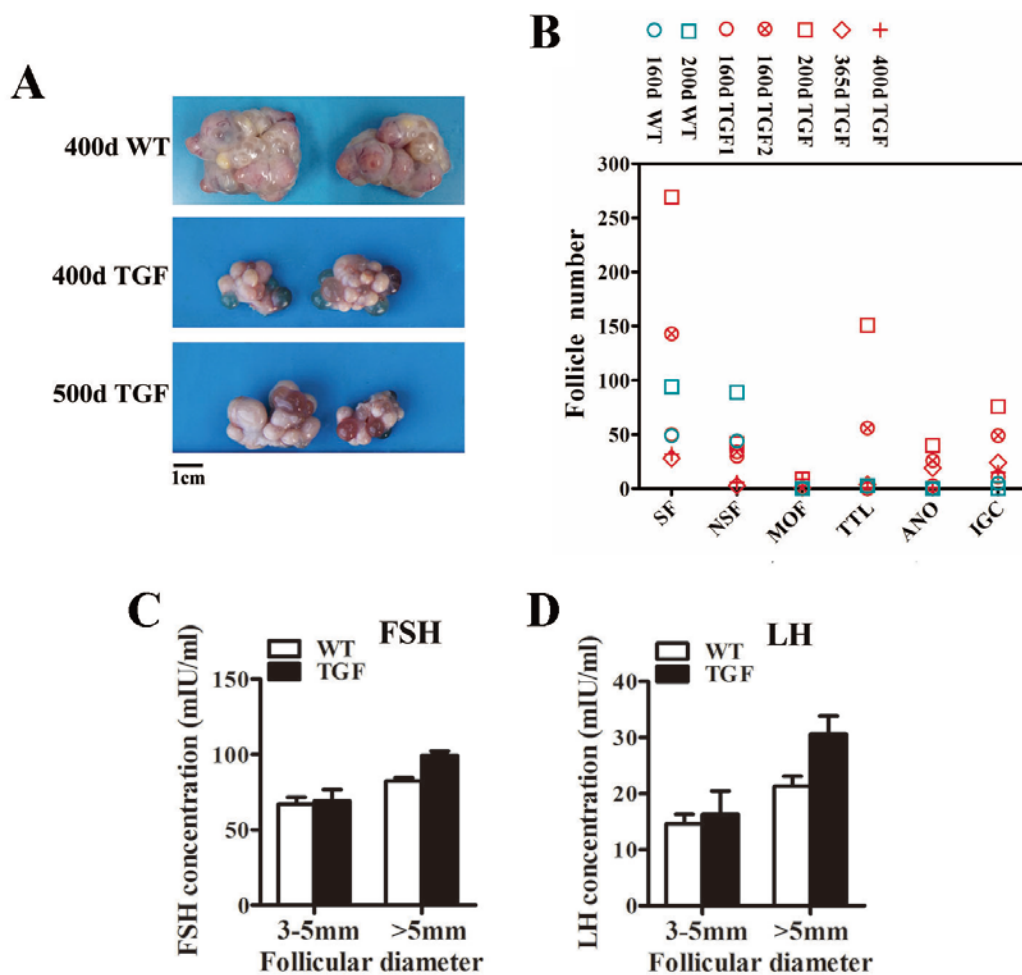

899

900

901 **Fig. S4. The phenotypes of TGF ovaries.** (A) Both 400 and 500-day TGF ovaries were apparently smaller  
 902 than 400-day WT ovaries, but they contained plenty of corpus luteums on the surface. (B) Statistical analysis  
 903 showed less normal secondary follicles (SFs) in TGF ovaries but higher proportion of abnormal SFs. Each  
 904 three ovarian sections of two WT ovaries and five TGF ovaries were examined. These ovaries were from  
 905 different gilts at age of 160 to 400 days. Four types of abnormal follicular were distinguished as followings:  
 906 MOF, multioocyte follicle; TTL, thickened theca and basal lamina; ANO, abnormal oocyte; IGC, irregular  
 907 and degrading granular cells. NSF stands for normal secondary follicle. (C) The concentration of both FSH  
 908 and LH (D) in follicular fluid was not significantly different e between TGF and WT antral follicles.

909

910

911

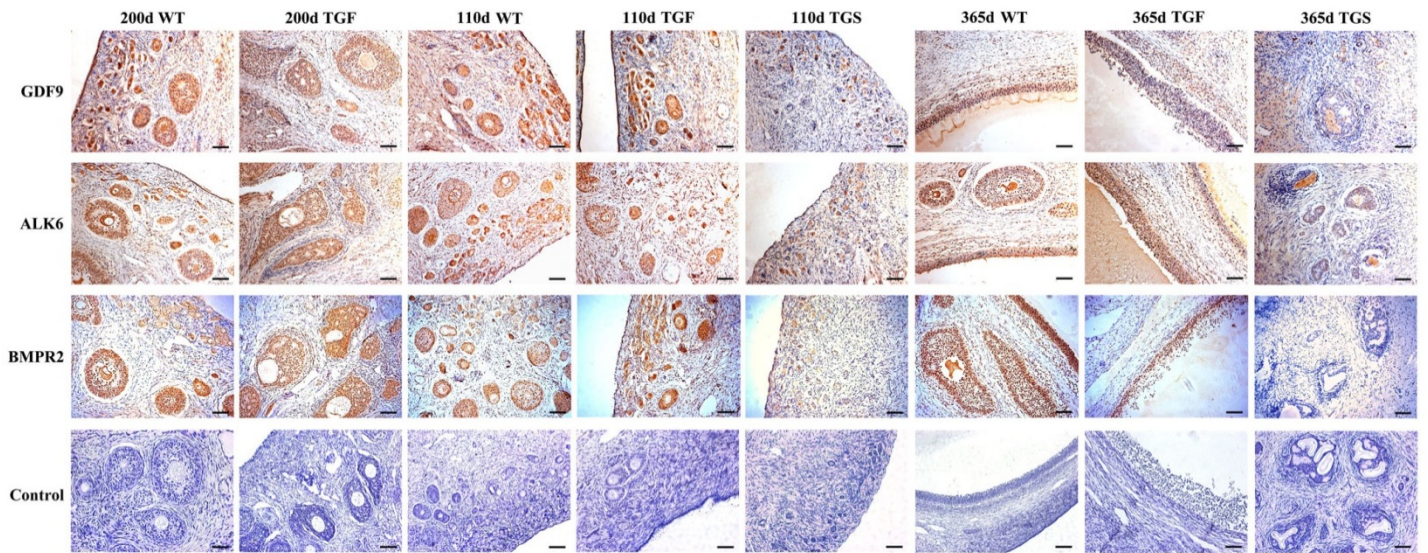

**Fig. S5. Expression of GDF9, ALK6 and BMPR2 was not affected in TGF follicles.** Immunohistochemical staining showed that expression levels of GDF9, ALK6 and BMPR2 were not significant different between TGF and WT follicles, but significantly declined in 110 and 365-day TGS follicles. Scale bar = 100 $\mu$ m.

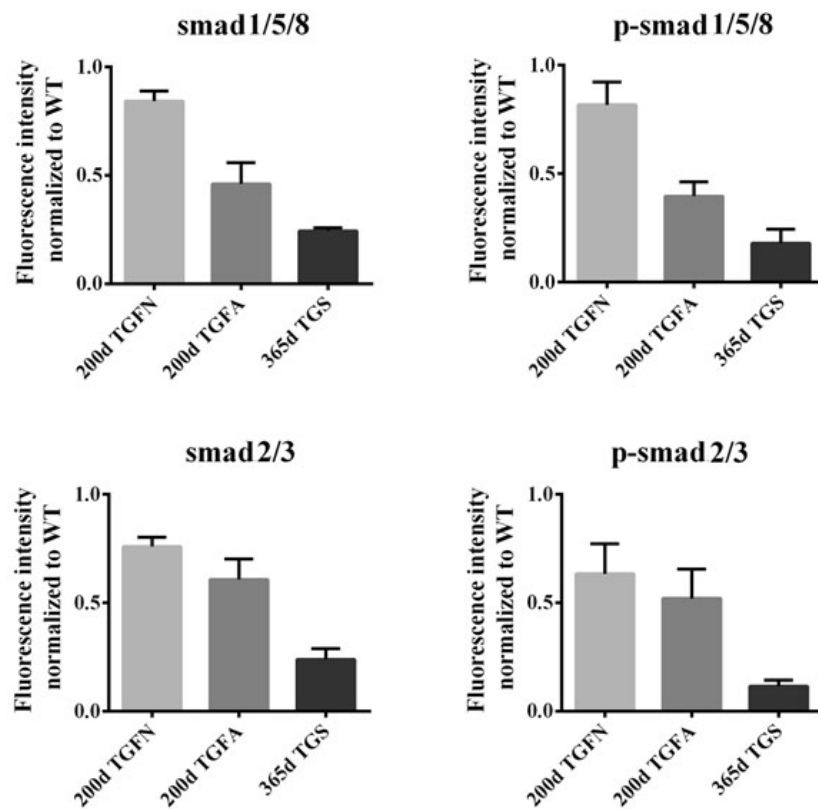

**Fig. S6. Smad1/5/8 signaling transduction was more affected by knocking down of BMP15 in TGF abnormal follicles.** Fluorescence intensity of Smad1/5/8 signaling was decreased more than Smad2/3 signaling in TGF abnormal follicles, though they were both remarkably decreased in TGS follicles.

924 Fluorescence signals were quantied by Image J software, statistic analysis was used graphpad prism  
 925 software.

926  
 927  
 928

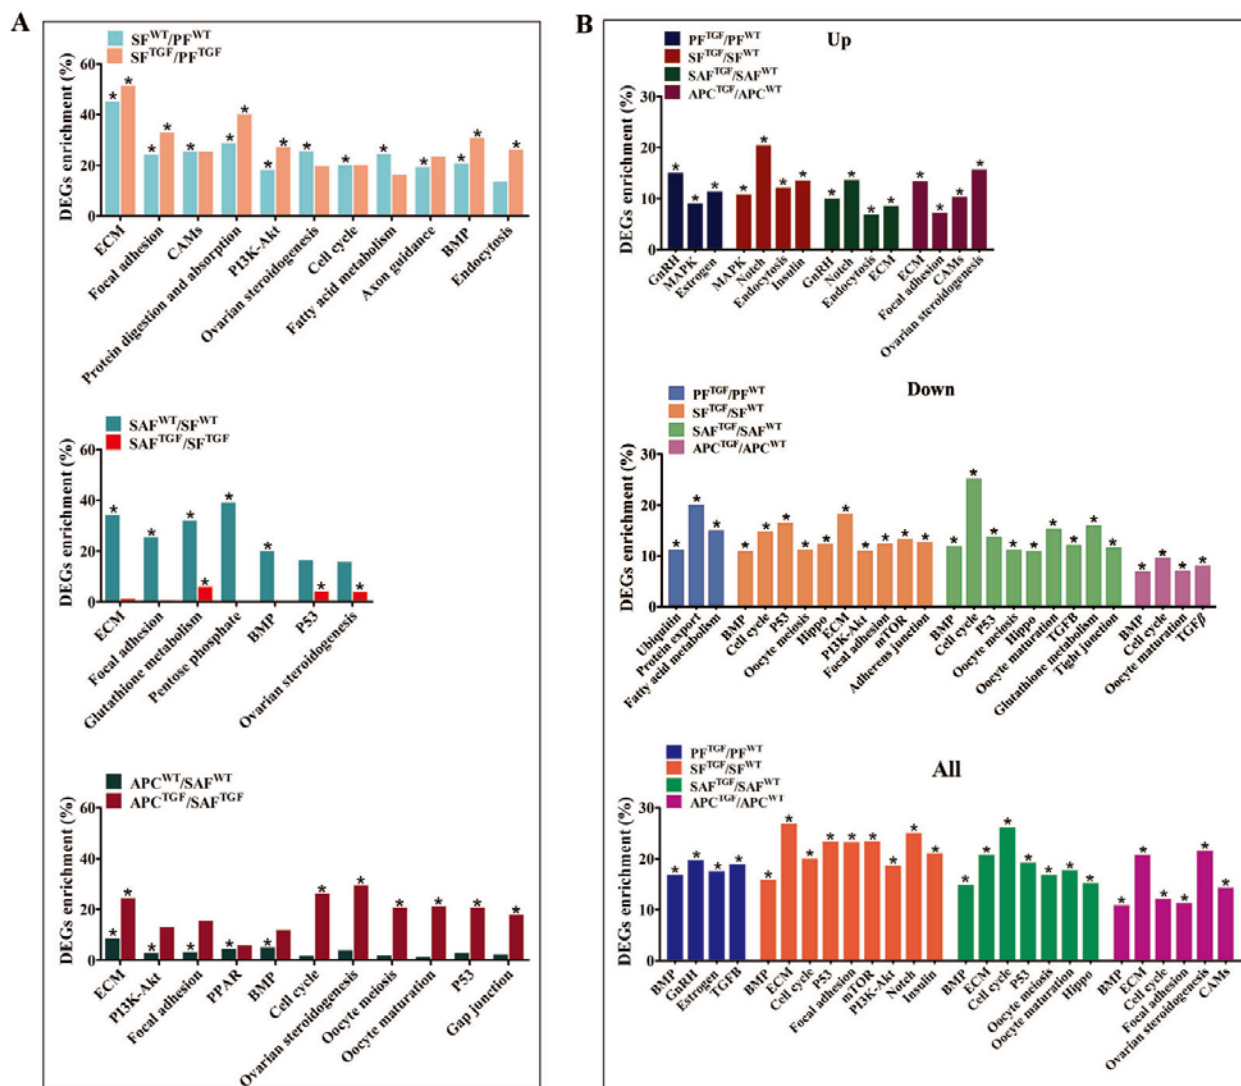

929  
 930  
 931

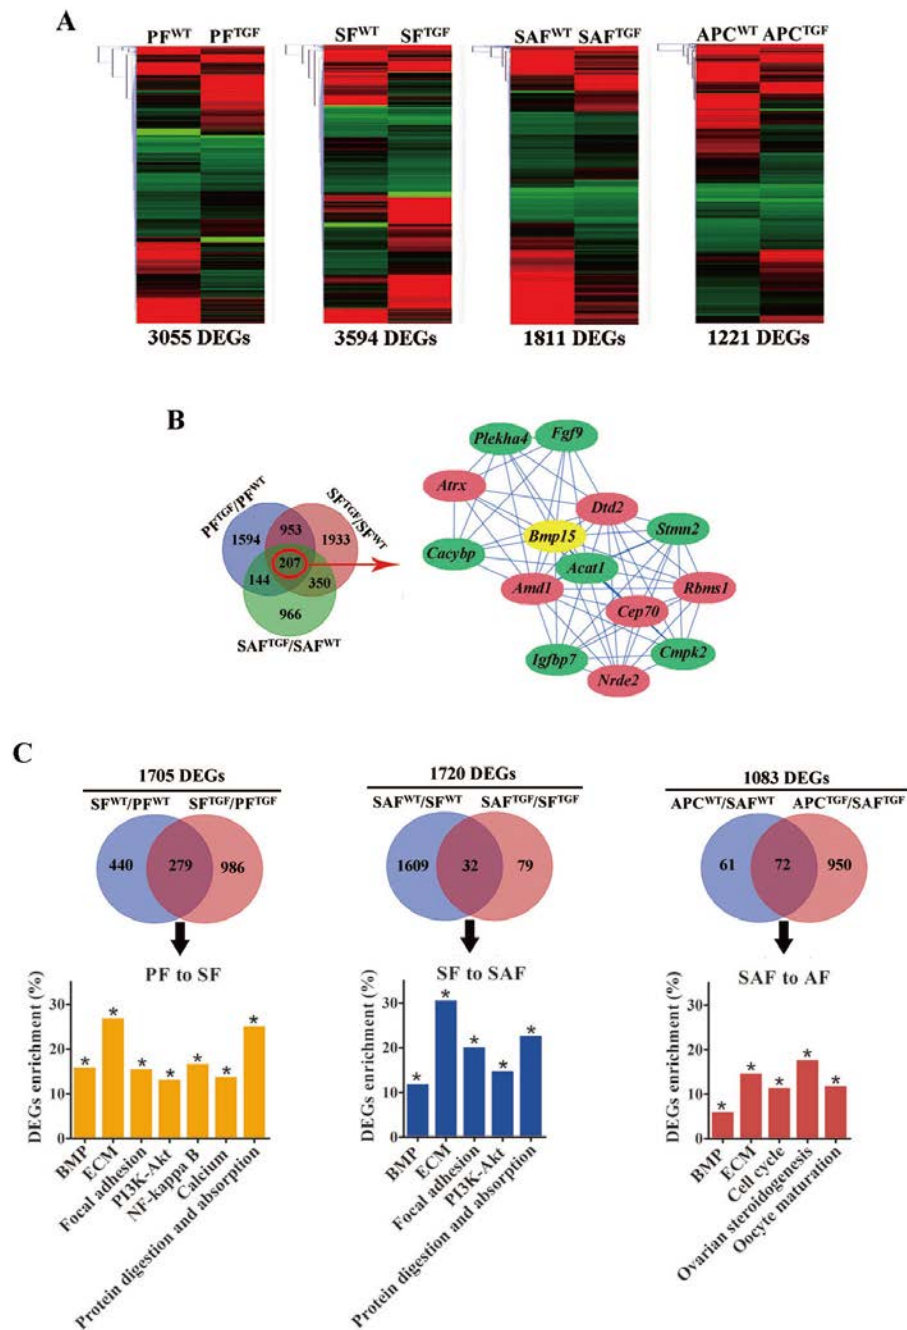

**Fig. S8. Further analysis of the transcriptomic data.** (A) Both DEGs number and their clustering pattern revealed a highly different gene expression between WT and TGF follicle during each follicle stages. (B) A correlation analysis of the DEGs predicted 7 DEGs (in green ellipse) closely negatively correlated to *Bmp15* (correlation coefficient  $<-0.98$ ), and 6 DEGs (in red ellipse) closely positive correlated to *Bmp15* (correlation coefficient  $>0.98$ ). c Further analysis of the three developmental transitions based on twice DEGs identifications.

**Table S1. Sequence of siRNA targeting porcine *Bmp15* gene**

| siRNAs   | Sequence (5' to 3')    |
|----------|------------------------|
| siRNA1 F | UUGCUC CAUUAACCAAUGGTT |
| siRNA1 R | CCAUUGGUUAAUGGAGCAATT  |
| siRNA2 F | GGUCCUCCUCAGCAUCAUUTT  |
| siRNA2 R | AAUGAUGCUGAGGAGGACCTT  |
| siRNA3 F | GGAGAUGGAUGUCACGCAATT  |
| siRNA3 R | UUGCUGACAUCAUCUCCTT    |
| siRNA4 F | CCAAGUCAGCUUCCACCAATT  |
| siRNA4 R | UUGGUGGAAGCUGACUUGGTT  |
| siRNA5 F | CCAACUGGGUUGGGAUCAUTT  |
| siRNA5 R | AUGAUCCCAACCCAGUUGGTT  |
| NC F     | GGUCCUACUACGCUCCAUU TT |
| NC R     | AAUGGAGCGUAGUAGGACC TT |

944

945

946

947

**Table S2. Primers for integrated plasmid detection**

| Experiment    | Primer  | Sequence (5' to 3')   |
|---------------|---------|-----------------------|
| PCR           | shRNA-F | CTATTTCCCATGATTCCTTC  |
|               | shRNA-R | ATCAGAGCAGCCGATTGT    |
| RT-PCR        | hU6-F   | GCAGGAAGAGGGCCTATTTTC |
|               | hU6-R   | GTTTCGTCCTTTCCACAAGA  |
| RT-PCR        | TFRC-F  | GAGACAGAACTTTCGAAGC   |
|               | TFRC-R  | GAAGTCTGTGGTATCCAATCC |
| Southern bolt | Probe-F | GACAACCACTACCTGAGCAC  |
|               | Probe-R | CGGTAAGCATATGATAGTCC  |

948

TFRC, transferrin receptor, was used to normalized the genomic DNA.

949

950

**Table S3. Primers for qPCR detection**

| Primer           | Sequence (5' to 3')    |
|------------------|------------------------|
| <i>Bmp15</i> F   | ATTAGCATCCTCCTGATTGA   |
| <i>Bmp15</i> R   | AACACTGAAGGCAAGAATA    |
| <i>Fsh</i> F     | ATCTCCCAATCTGTCTCA     |
| <i>Fsh</i> R     | TAGTCCTTTCACCCATTC     |
| <i>Lh</i> F      | CATCACCTTTACCACCAGCATC |
| <i>Lh</i> R      | GGGAAGGAGACCGTTGGGT    |
| <i>Gdf9</i> F    | AGACCAGCTCCAGCATCTTT   |
| <i>Gdf9</i> R    | GGATGGTACACCCTCAGACA   |
| <i>Fshr</i> F    | TTCACAGTCGCCCTCTTTCC   |
| <i>Fshr</i> R    | CAGCCACAGATGACCACAAA   |
| <i>Mad211</i> F  | GTTCTTCTCGTTTGGCATCA   |
| <i>Mad211</i> R  | CAAGCAAGGTAAGTCCGTAT   |
| <i>Mkp1</i> F    | ACCATCTGCCTCGCTTACCT   |
| <i>Mkp1</i> R    | GCTCCTCCTCTGCTTCACAA   |
| <i>Cyp19</i> F   | TCCGCAATGACTTGGGCTAC   |
| <i>Cyp19</i> R   | CTGGACTTTATGCACGAGGG   |
| <i>Star</i> F    | AAAGAACTCTATGGCTGGTA   |
| <i>Star</i> R    | AACAATCACTAATGGGAAAG   |
| <i>Hsd17β1</i> F | CTAAGGGACTTGACGGCACA   |
| <i>Hsd17β1</i> R | GGCATCCGCTATTGAATCTG   |
| <i>Prkaa1</i> F  | ATGGCAGAAGTTTGTAGAGC   |
| <i>Prkaa1</i> R  | GGAGTAGCAGTCCCTGATTT   |
| <i>Creb1</i> F   | GGGCAAACAACTAAGAGGG    |
| <i>Creb1</i> R   | ACCAGAATGCAGACAGGTCA   |
| <i>Npr2</i> F    | TTTGACAGCGTTACCATTTA   |
| <i>Npr2</i> R    | GGGAGACCAGATACCACCAT   |



*Ccnbl* F GAACAAGTATGCCACATCTA  
*Ccnbl* R AGTATTCCGAAGTTCACAAG  
*Cdk1* F AAAATCAGGCTAGAAAGTGA  
*Cdk1* R GGAGGGATAGAATCCAAGTA

---

952  
953  
954  
955  
956

**Table S4. Weight of ovaries from gilts of different ages**

| Day | Gilt | Weight L (g) | Weight R (g) | Total weight (g) |
|-----|------|--------------|--------------|------------------|
| 110 | TG   | 0.11         | 0.12         | 0.23             |
|     | WT   | 0.82         | 0.84         | 1.66             |
| 140 | TG   | 0.17         | 0.25         | 0.42             |
|     | WT   | 0.55         | 0.72         | 1.27             |
| 150 | TG   | 0.16         | 0.13         | 0.29             |
|     | WT   | 2.41         | 2.09         | 4.5              |
| 170 | TG   | 0.23         | 0.27         | 0.5              |
|     | WT   | 1.0          | 0.9          | 1.9              |

957  
958  
959  
960

L, left ovary ; R, right ovary

**Table S5. Statistical analysis of intensity of immunostaining signal for each detected factor**

| Follicle        | 200d WT | 200d TGFN | 200d TGFA | 110d TGS | 365d TGS |
|-----------------|---------|-----------|-----------|----------|----------|
| Antibody        |         |           |           |          |          |
| BMP15           | +++     | ++        | ++        | +        | +        |
| FSHR            | +++     | ++        | ++        | +        | +        |
| LHR (preantral) | ++      | +++       | +++       | +        | +        |
| LHR (antral)    | +++     | ++++      |           |          |          |
| 3βHSD           | +       |           | +++       |          | —        |
| Caspase 3       | +       |           | +         |          | +        |
| Ki67            | +++     |           | +++       |          | +        |

|             |     |     |    |   |
|-------------|-----|-----|----|---|
| Smad1/5/8   | +++ | +++ | +  | + |
| p-Smad1/5/8 | +++ | ++  | +  | + |
| Smad2/3     | +++ | ++  | ++ | + |
| p-Smad2/3   | +++ | ++  | ++ | + |

The intensity of immunostaining signal was assessed as followings: non-detectable (—), weak but definitely positive (+), moderately positive (++), and intensely positive (+++). TGFN, normal follicles in TGF ovaries; abnormal follicles in TGF ovaries.

**Table S6. Summary of DEGs in comparisons**

| Comparisons                            | Total | Up-regulated | Down-regulated |
|----------------------------------------|-------|--------------|----------------|
| Intra effect                           |       |              |                |
| SF <sup>WT</sup> /PF <sup>WT</sup>     | 2877  | 1099         | 1778           |
| SAF <sup>WT</sup> /SF <sup>WT</sup>    | 3503  | 1168         | 2335           |
| APC <sup>WT</sup> /SAF <sup>WT</sup>   | 350   | 163          | 187            |
| SF <sup>TGF</sup> /PF <sup>TGF</sup>   | 4503  | 1594         | 2909           |
| SAF <sup>TGF</sup> /SF <sup>TGF</sup>  | 236   | 74           | 162            |
| APC <sup>TGF</sup> /SAF <sup>TGF</sup> | 2390  | 1126         | 1264           |
| Inter effect                           |       |              |                |
| PF <sup>TGF</sup> /PF <sup>WT</sup>    | 3055  | 1482         | 1573           |
| SF <sup>TGF</sup> /SF <sup>WT</sup>    | 3594  | 1658         | 1936           |
| SAF <sup>TGF</sup> /SAF <sup>WT</sup>  | 1812  | 914          | 898            |
| APC <sup>TGF</sup> /APC <sup>WT</sup>  | 1221  | 606          | 615            |

PF, primary follicle; SF, secondary follicle; SAF, small antrum follicle; APC, large antrum parietal cell.

Table S7. Transcription profile of related genes

| Genes                    | Description                                     | PF <sup>TGF</sup> /PF <sup>WT</sup> |      |    | SF <sup>TGF</sup> /SF <sup>WT</sup> |      |    | SAF <sup>TGF</sup> /SAF <sup>WT</sup> |      |    | APC <sup>TGF</sup> /APC <sup>WT</sup> |      |    | COCs <sup>TGF</sup> /COCs <sup>WT</sup> |      |    |
|--------------------------|-------------------------------------------------|-------------------------------------|------|----|-------------------------------------|------|----|---------------------------------------|------|----|---------------------------------------|------|----|-----------------------------------------|------|----|
|                          |                                                 | Log2 fold change                    | FDR  | S  | Log2 fold change                    | FDR  | S  | Log2 fold change                      | FDR  | S  | Log2 fold change                      | FDR  | S  | Log2 fold change                        | FDR  | S  |
| BMPs and receptor        |                                                 |                                     |      |    |                                     |      |    |                                       |      |    |                                       |      |    |                                         |      |    |
| <i>Bmp1</i><br>5         | Bone morphogenetic protein 15                   | -2.9                                | 0.00 | s  | -3.6                                | 0.00 | s  | -4.1                                  | 0.05 | s  | NA                                    | NA   | ns | -6.2                                    | 0.00 | s  |
| <i>Gdf9</i>              | Growth differentiation factor 9                 | -0.4                                | 0.00 | ns | -0.9                                | 0.00 | ns | -1.6                                  | 0.00 | s  | -0.4                                  | 0.71 | ns | -3.4                                    | 0.00 | s  |
| <i>Bmpr</i><br>2         | Bone morphogenetic protein receptor type II     | -0.6                                | 0.00 | ns | -0.2                                | 0.03 | ns | -0.4                                  | 0.65 | ns | 0.0                                   | 0.68 | ns | 2.4                                     | 0.00 | s  |
| <i>Alk6</i>              | Bone morphogenetic protein receptor type-IB     | -1.4                                | 0.00 | s  | -1.1                                | 0.00 | s  | -0.1                                  | 0.56 | ns | 0.0                                   | 0.70 | ns | 1.5                                     | 0.00 | s  |
| <i>Bmp6</i>              | Bone morphogenetic protein 6                    | -0.3                                | 0.05 | ns | -0.2                                | 0.01 | ns | -1.4                                  | 0.00 | s  | -1.2                                  | 0.00 | s  | -0.6                                    | 0.08 | ns |
| <i>Bmp4</i>              | Bone morphogenetic protein 4                    | 0.5                                 | 0.36 | ns | 0.4                                 | 0.53 | ns | 0.1                                   | 0.63 | ns | 0.8                                   | 0.60 | ns | -0.2                                    | 0.65 | ns |
| Hormones and receptors   |                                                 |                                     |      |    |                                     |      |    |                                       |      |    |                                       |      |    |                                         |      |    |
| <i>Fshr</i>              | Follicle-stimulating hormone receptor           | -1.1                                | 0.17 | ns | -1.1                                | 0.00 | s  | -2.1                                  | 0.00 | s  | -2.0                                  | 0.00 | s  | -2.1                                    | 0.00 | s  |
| <i>Fst</i>               | Follistatin                                     | 2.1                                 | 0.00 | s  | 1.5                                 | 0.00 | s  | -1.1                                  | 0.00 | s  | 0.0                                   | 0.00 | ns | 1.1                                     | 0.00 | s  |
| <i>Pgrm</i><br><i>c1</i> | Progesterone receptor membrane component 1      | -0.3                                | 0.04 | ns | 0.3                                 | 0.48 | ns | -0.3                                  | 0.72 | ns | -0.2                                  | 0.75 | ns | 1.3                                     | 0.00 | s  |
| <i>Pgrm</i><br><i>c2</i> | Progesterone receptor membrane component 2      | -0.1                                | 0.49 | ns | -0.2                                | 0.11 | ns | -1.0                                  | 0.02 | s  | -0.6                                  | 0.22 | ns | 1.9                                     | 0.00 | s  |
| <i>Inha</i>              | Inhibin alpha                                   | 0.6                                 | 0.00 | ns | 1.5                                 | 0.00 | s  | -0.1                                  | 0.00 | ns | 1.6                                   | 0.00 | s  | 2.1                                     | 0.00 | s  |
| <i>Anhr</i><br>2         | Anti-Mullerian hormone receptor type 2          | 0.4                                 | 0.07 | ns | 0.9                                 | 0.00 | ns | 1.1                                   | 0.00 | s  | 1.8                                   | 0.00 | s  | 3.9                                     | 0.00 | s  |
| <i>Lhr</i>               | Luteinizing hormone/choriogonadotropin receptor | NA                                  | NA   | ns | 1.5                                 | 0.48 | ns | 1.6                                   | 0.29 | ns | 2.7                                   | 0.00 | s  | 5.4                                     | 0.00 | s  |
| <i>Esr1</i>              | Estrogen receptor 1                             | -0.6                                | 0.00 | ns | -1.0                                | 0.00 | ns | 0.0                                   | 0.60 | ns | -0.2                                  | 0.83 | ns | 1.6                                     | 0.01 | s  |
| <i>Acvr2</i><br><i>a</i> | Activin types II receptor                       | -1.1                                | 0.00 | s  | -1.7                                | 0.00 | s  | -0.7                                  | 0.56 | ns | -0.3                                  | 0.82 | ns | 1.1                                     | 0.59 | ns |
| <i>Igf1</i>              | Insulin-like growth factor I                    | -0.4                                | 0.49 | ns | 0.4                                 | 0.48 | ns | -1.3                                  | 0.03 | s  | 0.3                                   | 0.30 | ns | 2.4                                     | 0.00 | s  |
| <i>Igfbp</i><br>6        | Insulin like growth factor binding protein 6    | 0.2                                 | 0.26 | ns | -0.7                                | 0.03 | ns | 1.6                                   | 0.02 | s  | 1.9                                   | 0.06 | ns | -0.7                                    | 0.96 | ns |
| <i>Igfbp</i><br>7        | Insulin like growth factor binding protein 7    | 1.6                                 | 0.00 | s  | 2.2                                 | 0.00 | s  | 2.7                                   | 0.00 | s  | 3.3                                   | 0.00 | s  | 2.9                                     | 0.68 | ns |
| <i>Igfbp</i><br>4        | Insulin like growth factor binding protein 4    | 0.8                                 | 0.00 | ns | 1.7                                 | 0.00 | s  | 2.5                                   | 0.00 | s  | 2.3                                   | 0.00 | s  | 0.5                                     | 1.00 | ns |
| Steroidogenesis          |                                                 |                                     |      |    |                                     |      |    |                                       |      |    |                                       |      |    |                                         |      |    |
| <i>Cyp1</i><br><i>7a</i> | Cytochrome P450 17A                             | 2.4                                 | 0.27 | ns | 3.5                                 | 0.08 | ns | 3.1                                   | 0.01 | s  | 3.2                                   | 0.00 | s  | 4.2                                     | 0.02 | s  |

|                |                                                                            |      |      |    |      |      |    |      |      |    |      |      |    |      |      |    |
|----------------|----------------------------------------------------------------------------|------|------|----|------|------|----|------|------|----|------|------|----|------|------|----|
| <i>Cyp11a</i>  | Cytochrome P450 family 11 subfamily A member                               | 2.4  | 0.08 | ns | 1.6  | 0.00 | s  | 0.1  | 0.16 | ns | -0.7 | 0.04 | ns | 1.2  | 0.00 | s  |
| <i>Cyp19a</i>  | Cytochrome P450 family 19 subfamily A member                               | -0.9 | 0.45 | ns | 0.9  | 0.16 | ns | -0.1 | 0.57 | ns | 1.8  | 0.00 | s  | 5.5  | 0.00 | s  |
| <i>Hsd17β7</i> | Hydroxysteroid 17-beta dehydrogenase 7                                     | -1.1 | 0.00 | s  | -0.1 | 0.09 | ns | -0.8 | 0.16 | ns | -1.2 | 0.03 | ns | -2.0 | 0.00 | s  |
| <i>Hsd3β</i>   | Hydroxy-delta-5-steroid dehydrogenase, 3 beta- and steroid delta-isomerase | -0.6 | 0.06 | ns | -0.5 | 0.07 | ns | -0.1 | 0.67 | ns | 1.5  | 0.00 | s  | -1.7 | 0.63 | ns |
| <i>Star</i>    | Steroidogenic acute regulatory protein                                     | 0.2  | 0.54 | ns | 2.3  | 0.04 | s  | -0.9 | 0.69 | ns | 2.9  | 0.03 | s  | 6.5  | 0.00 | s  |
| <i>Nr5a2</i>   | Nuclear receptor subfamily 5_group A member 2                              | 2.8  | 0.04 | s  | 0.2  | 0.57 | ns | -1.1 | 0.34 | ns | 1.3  | 0.00 | s  | 2.4  | 0.00 | s  |
| SMADs          |                                                                            |      |      |    |      |      |    |      |      |    |      |      |    |      |      |    |
| <i>Smad1</i>   | SMAD family member 1                                                       | 1.4  | 0.00 | s  | 2.2  | 0.00 | s  | 0.4  | 0.14 | ns | -0.3 | 0.78 | ns | 0.3  | 0.95 | ns |
| <i>Smad2</i>   | SMAD family member 2                                                       | -0.5 | 0.33 | ns | 0.3  | 0.52 | ns | -1.1 | 0.03 | s  | -0.3 | 0.69 | ns | 0.3  | 0.66 | ns |
| <i>Smad3</i>   | SMAD family member 3                                                       | 0.5  | 0.05 | ns | 0.6  | 0.05 | ns | 0.0  | 0.15 | ns | -0.1 | 0.78 | ns | -0.1 | 0.35 | ns |
| <i>Smad4</i>   | SMAD family member 4                                                       | -0.5 | 0.03 | ns | -1.1 | 0.00 | s  | -1.8 | 0.00 | s  | -1.9 | 0.00 | s  | 0.3  | 0.82 | ns |
| <i>Smad5</i>   | SMAD family member 5                                                       | 0.8  | 0.01 | ns | -0.8 | 0.03 | ns | -1.1 | 0.22 | ns | -1.4 | 0.03 | s  | 0.8  | 0.00 | ns |
| <i>Smad8</i>   | SMAD family member8                                                        | 0.1  | 0.49 | ns | 0.1  | 0.51 | ns | 0.5  | 0.13 | ns | 1.1  | 0.03 | s  | 3.5  | 0.00 | s  |
| Cell cycle     |                                                                            |      |      |    |      |      |    |      |      |    |      |      |    |      |      |    |
| <i>Wee1</i>    | G2 checkpoint kinase                                                       | -0.9 | 0.03 | ns | -0.7 | 0.03 | ns | -1.7 | 0.00 | s  | -0.9 | 0.02 | ns | 0.4  | 1.00 | ns |
| <i>Wee2</i>    | WEE1 homolog 2                                                             | -1.4 | 0.00 | s  | -0.8 | 0.17 | ns | -0.8 | 0.53 | ns | -2.3 | 0.61 | ns | -3.3 | 0.00 | s  |
| <i>Cdc25c</i>  | M-phase inducer phosphatase 3                                              | -0.6 | 0.13 | ns | -0.4 | 0.21 | ns | -2.4 | 0.07 | ns | -0.6 | 0.67 | ns | -3.0 | 0.00 | s  |
| <i>Rb1</i>     | RB transcriptional corepressor 1                                           | -1.1 | 0.00 | s  | -1.1 | 0.00 | s  | -1.0 | 0.29 | ns | -0.7 | 0.37 | ns | NA   | NA   | ns |
| <i>Orc6</i>    | Origin recognition complex subunit 6                                       | 0.0  | 0.56 | ns | -1.4 | 0.04 | s  | -1.3 | 0.36 | ns | 0.3  | 0.59 | ns | -1.6 | 0.00 | s  |
| <i>Orc3</i>    | Origin recognition complex subunit 3                                       | -0.6 | 0.03 | ns | -1.0 | 0.00 | s  | -1.4 | 0.00 | s  | -1.2 | 0.00 | s  | -0.4 | 0.00 | ns |
| <i>Cnd3</i>    | Cyclin D3                                                                  | -0.1 | 0.44 | ns | -0.4 | 0.02 | ns | -1.0 | 0.01 | s  | -0.1 | 0.76 | ns | -0.5 | 0.65 | ns |
| <i>Cne2</i>    | G1/S-specific cyclin-E2                                                    | -2.2 | 0.19 | ns | -0.3 | 0.43 | ns | -1.8 | 0.34 | ns | -1.2 | 0.09 | ns | -1.1 | 0.00 | s  |
| <i>E2f1</i>    | E2F transcription factor 1                                                 | 0.0  | 0.56 | ns | 0.1  | 0.46 | ns | -1.4 | 0.00 | s  | 0.1  | 0.50 | ns | -1.9 | 0.73 | ns |
| <i>Mcm2</i>    | Minichromosome maintenance complex component 2                             | 0.2  | 0.32 | ns | -0.1 | 0.20 | ns | -1.4 | 0.00 | s  | -0.7 | 0.00 | ns | -1.7 | 0.01 | s  |
| <i>Mcm3</i>    | Minichromosome maintenance                                                 | -0.3 | 0.27 | ns | -0.3 | 0.05 | ns | -1.1 | 0.00 | s  | -0.7 | 0.03 | ns | -1.8 | 0.00 | s  |

|                |                                                                    |      |      |    |      |      |    |      |      |    |      |      |        |        |       |        |
|----------------|--------------------------------------------------------------------|------|------|----|------|------|----|------|------|----|------|------|--------|--------|-------|--------|
|                | complex component 3                                                |      |      |    |      |      |    |      |      |    |      |      | s      |        |       |        |
| <i>Tfdp2</i>   | Transcription factor Dp-2                                          | -0.2 | 0.38 | ns | -0.6 | 0.08 | ns | -0.3 | 0.72 | ns | -0.8 | 0.67 | n<br>s | -2.5   | 0.00  | s      |
| <i>Hdac2</i>   | Histone deacetylase 2                                              | -0.5 | 0.02 | ns | -0.8 | 0.00 | ns | -1.2 | 0.00 | s  | -1.4 | 0.00 | s      | 0.5    | 1.00  | n<br>s |
| <i>Gadd45g</i> | Growth arrest and DNA damage-inducible protein GADD45 gamma        | 2.3  | 0.00 | s  | 1.7  | 0.01 | s  | 0.4  | 0.28 | ns | 1.2  | 0.00 | s      | 2.8    | 0.81  | n<br>s |
| <i>Ttk</i>     | Dual specificity protein kinase TTK isoform X1                     | -0.1 | 0.57 | ns | -3.4 | 0.01 | s  | -1.8 | 0.22 | ns | -0.8 | 0.43 | n<br>s | -1.2   | 0.00  | s      |
| <i>Bbu1</i>    | Mitotic checkpoint serine/threonine-protein kinase BUB1 isoform X1 | -1.9 | 0.18 | ns | -0.6 | 0.38 | ns | -2.5 | 0.22 | ns | -0.3 | 0.78 | n<br>s | -1.6   | 0.00  | s      |
| <i>Bub3</i>    | Mitotic checkpoint serine/threonine-protein kinase BUB3            | -0.7 | 0.00 | ns | -1.0 | 0.00 | s  | -1.3 | 0.00 | s  | -0.9 | 0.00 | n<br>s | -0.5   | 0.00  | n<br>s |
| <i>Cdk1</i>    | Cyclin dependent kinase 1                                          | -0.2 | 0.37 | ns | -1.6 | 0.00 | s  | -2.1 | 0.00 | s  | -1.4 | 0.00 | s      | -1.7   | 0.00  | s      |
| <i>Ptg1</i>    | Securin isoform X1                                                 | 0.6  | 0.00 | ns | -1.0 | 0.00 | s  | -1.7 | 0.00 | s  | -1.0 | 0.00 | n<br>s | -2.7   | 0.00  | s      |
| <i>14-3-3</i>  | 14-3-3 protein                                                     | -2.3 | 0.00 | s  | -2.0 | 0.00 | s  | -1.2 | 0.00 | s  | -0.6 | 0.00 | n<br>s | 0.7    | 0.63  | n<br>s |
| <i>Mad21l</i>  | Mitotic spindle assembly checkpoint protein MAD2A                  | -1.0 | 0.00 | s  | -1.0 | 0.00 | s  | -2.0 | 0.00 | s  | -1.0 | 0.00 | s      | -1.2   | 0.00  | s      |
| <i>Ccnb2</i>   | G2/mitotic-specific cyclin-B2                                      | -0.5 | 0.26 | ns | -0.8 | 0.10 | ns | -1.9 | 0.01 | s  | -0.4 | 0.70 | n<br>s | -2.7   | 0.00  | s      |
| <i>Ccna2</i>   | Cyclin A2                                                          | -0.1 | 0.52 | ns | -0.8 | 0.01 | ns | -1.5 | 0.00 | s  | -1.1 | 0.00 | s      | -1.3   | 0.00  | s      |
| <i>Cdkn2c</i>  | Cyclin-dependent kinase 4 inhibitor C                              | 0.2  | 0.51 | ns | -0.7 | 0.04 | ns | -1.5 | 0.00 | s  | -0.5 | 0.30 | n<br>s | 2.3    | 0.00  | s      |
| <i>Plk1</i>    | Polo like kinase 1                                                 | 0.4  | 0.40 | ns | 0.4  | 0.47 | ns | -1.6 | 0.00 | s  | -0.8 | 0.03 | n<br>s | -4.3   | 0.09  | n<br>s |
| <i>Chek1</i>   | Checkpoint kinase 1                                                | -0.5 | 0.34 | ns | -0.4 | 0.22 | ns | -1.2 | 0.17 | ns | -1.2 | 0.07 | n<br>s | -1.9   | 0.00  | s      |
| <i>Pena</i>    | Proliferating cell nuclear antigen                                 | -0.3 | 0.02 | ns | -0.9 | 0.00 | ns | -1.4 | 0.00 | s  | -0.7 | 0.00 | n<br>s | -2.4   | 0.00  | s      |
| <i>Cdc6</i>    | Cell division control protein 6 homolog                            | 1.0  | 0.19 | ns | 0.2  | 0.58 | ns | -0.6 | 0.63 | ns | -0.9 | 0.47 | n<br>s | -3.0   | 0.00  | s      |
| <i>Cdc45</i>   | Cell division control protein 45 homolog isoform X4                | 0.6  | 0.18 | ns | -0.1 | 0.26 | ns | -0.7 | 0.44 | ns | -0.7 | 0.16 | n<br>s | -1.7   | 0.00  | s      |
| <i>Anapc5</i>  | Anaphase-promoting complex subunit 5 isoform X1                    | -1.1 | 0.02 | s  | 0.1  | 0.43 | ns | -0.3 | 0.73 | ns | -0.5 | 0.49 | n<br>s | 2.3    | 0.00  | s      |
| <i>Ccnb3</i>   | Cyclin B3                                                          | -0.9 | 0.15 | ns | -1.1 | 0.03 | s  | -2.1 | 0.01 | s  | -1.1 | 0.05 | n<br>s | -2.5   | 0.00  | s      |
| <i>Myc</i>     | MYC proto-oncogene, bHLH transcription factor                      | 1.1  | 0.01 | s  | -0.1 | 0.12 | ns | -1.6 | 0.00 | s  | -2.5 | 0.00 | s      | -1.0   | 0.33  | n<br>s |
| Others         |                                                                    |      |      |    |      |      |    |      |      |    |      |      |        |        |       |        |
| <i>Irf6</i>    | Interferon regulatory factor 6                                     | 0.53 | 0.30 | ns | -0.2 | 0.44 | ns | 1.0  | 0.41 | ns | 1.9  | 0.11 | n<br>s | -1.700 | 0.000 | s      |
| <i>Mkp</i>     | Dual specificity protein phosphatase 1                             | 0.9  | 0.0  | ns | 0.6  | 0.2  | ns | -0.9 | 0.3  | ns | -0.8 | 0.3  | n      | -0.3   | 0.5   | ns     |

|               |                                                      |      |      |    |      |      |    |      |      |    |      |      |   |      |      |    |
|---------------|------------------------------------------------------|------|------|----|------|------|----|------|------|----|------|------|---|------|------|----|
| <i>I</i>      |                                                      |      |      |    |      |      |    |      |      |    |      |      | s |      |      |    |
| <i>Zp3</i>    | Zona pellucida sperm-binding protein 3               | 0.0  | 0.48 | ns | -0.8 | 0.00 | ns | -1.8 | 0.00 | s  | 0.5  | 0.34 | n | -3.0 | 0.00 | s  |
| <i>Zp2</i>    | Zona pellucida sperm-binding protein 2               | 0.7  | 0.20 | ns | -1.1 | 0.00 | s  | -2.1 | 0.00 | s  | 1.1  | 0.23 | n | -2.8 | 0.00 | s  |
| <i>Zp4</i>    | Zona pellucida sperm-binding protein 4               | 0.1  | 0.52 | ns | -1.5 | 0.00 | s  | -2.1 | 0.00 | s  | 0.1  | 0.73 | n | -3.0 | 0.00 | s  |
| <i>Zar1</i>   | Zygote arrest 1                                      | 0.0  | 0.53 | ns | -1.0 | 0.00 | s  | -1.1 | 0.22 | ns | 0.5  | 0.69 | n | -2.9 | 0.00 | s  |
| <i>Cx43</i>   | Gap junction protein alpha 1                         | 0.3  | 0.04 | ns | 0.2  | 0.51 | ns | -0.5 | 0.07 | ns | 0.2  | 0.00 | n | 2.9  | 0.00 | s  |
| <i>Cja10</i>  | Gap junction protein alpha 10                        | -2.3 | 0.00 | s  | -0.9 | 0.21 | ns | -0.1 | 0.71 | ns | 1.6  | 0.64 | n | -2.8 | 0.00 | s  |
| <i>Cja5</i>   | Gap junction protein alpha 5                         | -0.6 | 0.05 | ns | -1.5 | 0.00 | s  | -1.5 | 0.00 | s  | -1.3 | 0.10 | n | -2.3 | 0.00 | s  |
| <i>Camk2d</i> | Calcium/calmodulin dependent protein kinase II delta | 0.9  | 0.02 | ns | 1.3  | 0.04 | s  | 1.4  | 0.01 | s  | 2.2  | 0.00 | s | 2.0  | 0.00 | s  |
| <i>Kit</i>    | Tyrosine-protein kinase                              | 1.7  | 0.00 | s  | 1.1  | 0.00 | s  | -1.2 | 0.00 | s  | -0.6 | 0.00 | n | 0.6  | 0.49 | ns |
| <i>Bax</i>    | BCL2 associated X, apoptosis regulator               | 1.1  | 0.00 | s  | 0.7  | 0.06 | ns | 0.3  | 0.02 | ns | 0.8  | 0.00 | n | -0.9 | 0.98 | ns |
| <i>Fbn1</i>   | Fibrillin 1                                          | 0.8  | 0.18 | ns | 1.1  | 0.18 | ns | 0.8  | 0.40 | ns | 0.2  | 0.78 | n | -1.2 | 0.04 | s  |
| <i>Casp8</i>  | Caspase 8                                            | -0.9 | 0.33 | ns | -1.1 | 0.06 | ns | 0.1  | 0.60 | ns | -1.7 | 0.24 | n | 0.9  | 0.85 | ns |
| <i>Casp9</i>  | Caspase 9                                            | -0.1 | 0.55 | ns | 0.5  | 0.44 | ns | -0.4 | 0.70 | ns | -1.0 | 0.35 | n | 0.6  | 1.00 | ns |

977 Words in red were marked for significantly increased, in green were marked for significantly decreased, s,  
978 significant; ns, no significant.

979

980

981

982

**Table S8. Transcription profile of genes closely correlation with *Bmp15***

| Genes         | Describe                           | PF <sup>TGF</sup> /PF <sup>WT</sup> |      | SF <sup>TGF</sup> /SF <sup>WT</sup> |      | SAF <sup>TGF</sup> /SAF <sup>WT</sup> |      |
|---------------|------------------------------------|-------------------------------------|------|-------------------------------------|------|---------------------------------------|------|
|               |                                    | Log2 fold change                    | FDR  | Log2 fold change                    | FDR  | Log2 fold change                      | FDR  |
| <i>Bmp15</i>  | Bone morphogenetic protein 15      | -2.9                                | 0.00 | -3.6                                | 0.00 | -4.1                                  | 0.05 |
| <i>Amd1</i>   | Adenosylmethionine decarboxylase 1 | -1.1                                | 0.00 | -1.3                                | 0.00 | -1.6                                  | 0.00 |
| <i>Cacybp</i> | Calcyclin binding protein          | -1.4                                | 0.00 | -1.1                                | 0.00 | -1.0                                  | 0.00 |

|                |                                                         |      |      |      |      |      |      |
|----------------|---------------------------------------------------------|------|------|------|------|------|------|
| <i>Acat1</i>   | Acetyl-CoA acetyltransferase 1                          | -1.6 | 0.00 | -1.3 | 0.00 | -1.0 | 0.00 |
| <i>Dtd2</i>    | D-tyrosyl-tRNA deacylase 2                              | -1.1 | 0.00 | -1.5 | 0.00 | -1.7 | 0.01 |
| <i>Cep70</i>   | Centrosomal protein 70                                  | -1.1 | 0.00 | -1.2 | 0.00 | -1.2 | 0.03 |
| <i>Nrde2</i>   | Necessary for RNA interference, domain containing       | 2.3  | 0.00 | 1.9  | 0.00 | 1.5  | 0.00 |
| <i>Plekha4</i> | Pleckstrin homology domain containing A4                | 1.0  | 0.02 | 1.4  | 0.00 | 1.5  | 0.00 |
| <i>Stmn2</i>   | Stathmin 2                                              | 1.1  | 0.00 | 1.6  | 0.00 | 2.2  | 0.00 |
| <i>Cmpk2</i>   | Cytidine/uridine monophosphate kinase 2                 | 1.2  | 0.01 | 2.4  | 0.00 | 3.4  | 0.00 |
| <i>Igfbp7</i>  | Insulin like growth factor binding protein 7            | 1.6  | 0.00 | 2.2  | 0.00 | 2.7  | 0.00 |
| <i>Fgf9</i>    | Fibroblast growth factor 9                              | 1.5  | 0.00 | 2.0  | 0.00 | 2.1  | 0.00 |
| <i>Atrx</i>    | Chromatin remodeler                                     | 3.3  | 0.00 | 2.1  | 0.00 | 1.6  | 0.00 |
| <i>Rbms1</i>   | RNA binding motif single stranded interacting protein 1 | 2.4  | 0.00 | 1.8  | 0.00 | 1.2  | 0.00 |

983

984

985

986

**Table S9. Genes involved in oocyte meiosis**

| Gene                                | Describe                              | SF <sup>TGF</sup> /SF <sup>WT</sup> |      |    | SAF <sup>TGF</sup> /SAF <sup>WT</sup> |      |    | COCs <sup>TGF</sup> /COCs <sup>WT</sup> |      |    |
|-------------------------------------|---------------------------------------|-------------------------------------|------|----|---------------------------------------|------|----|-----------------------------------------|------|----|
|                                     |                                       | Log2 fold change                    | FDR  | S  | Log2 fold change                      | FDR  | S  | Log2 fold change                        | FDR  | S  |
| cGMP and cAMP concentration related |                                       |                                     |      |    |                                       |      |    |                                         |      |    |
| <i>Impdh2</i>                       | Inosine monophosphate dehydrogenase 2 | -0.5                                | 0.00 | ns | -0.3                                  | 0.73 | ns | 0.2                                     | 0.20 | ns |
| <i>Pde3a</i>                        | Phosphodiesterase 3A                  | 0.3                                 | 0.58 | ns | 1.0                                   | 0.59 | ns | NA                                      | NA   | ns |
| <i>Gpr3</i>                         | G protein-coupled receptor 3          | NA                                  | NA   | ns | NA                                    | NA   | ns | NA                                      | NA   | ns |
| <i>Nppc</i>                         | Natriuretic peptide C                 | -0.5                                | 0.53 | ns | NA                                    | NA   | ns | 0.5                                     | 1.00 | ns |
| <i>Npr2</i>                         | Natriuretic peptide receptor 2        | -0.3                                | 0.00 | ns | 0.0                                   | 0.06 | ns | 0.6                                     | 0.96 | ns |
| <i>Cx43</i>                         | Gap junction alpha-1 protein          | 0.2                                 | 0.51 | ns | -0.5                                  | 0.07 | ns | 2.9                                     | 0.00 | s  |

|                                |                                                 |      |      |    |      |      |    |      |      |    |
|--------------------------------|-------------------------------------------------|------|------|----|------|------|----|------|------|----|
| <i>Zp3</i>                     | Zona pellucida glycoprotein 3                   | -0.8 | 0.00 | ns | -1.8 | 0.00 | s  | -3.0 | 0.00 | s  |
| <i>Zp2</i>                     | Zona pellucida glycoprotein 2                   | -1.1 | 0.00 | s  | -2.1 | 0.00 | s  | -2.8 | 0.00 | s  |
| MPF related                    |                                                 |      |      |    |      |      |    |      |      |    |
| <i>Cdk1</i>                    | Cyclin dependent kinase 1                       | -1.6 | 0.00 | s  | -2.1 | 0.00 | s  | -1.7 | 0.00 | s  |
| <i>Ccnb1</i>                   | Cyclin B1                                       | -1.2 | 0.00 | s  | -2.9 | 0.00 | s  | -2.1 | 0.00 | s  |
| <i>Ccnb2</i>                   | Cyclin B2                                       | -0.8 | 0.10 | ns | -1.9 | 0.01 | s  | -2.7 | 0.00 | s  |
| <i>Wee2</i>                    | WEE1 homolog 2                                  | -0.8 | 0.17 | ns | -0.8 | 0.53 | ns | -3.3 | 0.00 | s  |
| <i>Cdc25b</i>                  | Cell division cycle 25B                         | -0.7 | 0.00 | ns | -0.8 | 0.34 | ns | -2.3 | 0.00 | s  |
| <i>Cdc25c</i>                  | Cell division cycle 25C                         | -0.4 | 0.21 | ns | -2.4 | 0.07 | ns | -3.0 | 0.00 | s  |
| <i>Mos</i>                     | MOS proto-oncogene, serine/threonine kinase     | -0.1 | 0.31 | ns | -0.8 | 0.54 | ns | -3.0 | 0.00 | s  |
| APC/C-CDC20 complex regulators |                                                 |      |      |    |      |      |    |      |      |    |
| <i>Anapc5</i>                  | Anaphase promoting complex subunit 5            | 0.1  | 0.43 | ns | -0.3 | 0.73 | ns | 2.3  | 0.00 | s  |
| <i>Emi1</i>                    | F-box protein 5                                 | -1.3 | 0.00 | s  | -1.4 | 0.02 | s  | -2.3 | 0.00 | s  |
| <i>Emi2</i>                    | F-box protein 43                                | NA   | NA   | ns | NA   | NA   | ns | -2.7 | 0.00 | s  |
| M1 division related            |                                                 |      |      |    |      |      |    |      |      |    |
| <i>Pttg1</i>                   | Pituitary tumor-transforming 1                  | -1.0 | 0.00 | s  | -1.7 | 0.00 | s  | -2.7 | 0.00 | s  |
| <i>Smc1b</i>                   | Structural maintenance of chromosome 1B         | -2.1 | 0.00 | s  | -3.1 | 0.02 | s  | -2.8 | 0.00 | s  |
| <i>Rec8</i>                    | REC8 meiotic recombination protein              | 1.5  | 0.01 | s  | 1.4  | 0.00 | s  | 1.5  | 0.98 | ns |
| M2 division related            |                                                 |      |      |    |      |      |    |      |      |    |
| <i>Bub1</i>                    | BUB1 mitotic checkpoint serine/threonine kinase | -0.6 | 0.38 | ns | -2.5 | 0.22 | ns | -1.6 | 0.00 | s  |
| <i>Ppp2r1b</i>                 | Protein phosphatase 2 scaffold subunit Abeta    | -1.4 | 0.00 | s  | -0.5 | 0.69 | ns | -1.3 | 0.00 | s  |
| <i>Sgo1</i>                    | Shugoshin 1                                     | -0.1 | 0.48 | ns | -2.1 | 0.12 | ns | -1.8 | 0.00 | s  |



DNA repair and spindle stability related

|               |                              |      |      |   |      |      |   |      |      |   |
|---------------|------------------------------|------|------|---|------|------|---|------|------|---|
| <i>Dlgap5</i> | DLG associated protein 5     | -1.8 | 0.00 | s | -1.3 | 0.00 |   | -2.3 | 0.00 | s |
| <i>Ttk</i>    | TTK protein kinase           | -3.4 | 0.01 | s | -1.8 | 0.02 | s | -1.2 | 0.00 | s |
| <i>Kif18a</i> | Kinesin family member<br>18A | -2.0 | 0.04 | s | -1.8 | 0.02 | s | -2.2 | 0.00 | s |

Others

Calcium/calmodulin

|               |                                                |      |      |    |      |      |    |      |      |   |
|---------------|------------------------------------------------|------|------|----|------|------|----|------|------|---|
| <i>Camk2d</i> | dependent protein kinase II<br>delta           | 1.3  | 0.04 | s  | 1.4  | 0.01 | s  | 2.0  | 0.00 | s |
| <i>Mad2l1</i> | Mitotic spindle assembly<br>checkpoint protein | -1.0 | 0.00 | s  | -2.0 | 0.00 | s  | -1.2 | 0.00 | s |
| <i>Slk</i>    | STE20 like kinase                              | -0.5 | 0.01 | ns | -0.5 | 0.61 | ns | 1.5  | 0.00 | s |
| <i>Pgrma1</i> | progesterone receptor<br>membrane component 1  | 0.3  | 0.48 | ns | -0.3 | 0.72 | ns | 1.3  | 0.00 | s |
| <i>Aurkb</i>  | Aurora kinase B                                | -0.2 | 0.21 | ns | -1.1 | 0.02 | s  | -2.0 | 0.00 | s |
| <i>Cdk2c</i>  | Cyclin dependent kinase<br>inhibitor 2C        | -0.7 | 0.04 | ns | -1.5 | 0.00 | s  | 2.3  | 0.00 | s |
| <i>Bmp15</i>  | Bone morphogenetic<br>protein 15               | -3.6 | 0.00 | s  | -4.1 | 0.05 | s  | -6.2 | 0.00 | s |
| <i>Gdf9</i>   | Growth differentiation<br>factor 9             | -0.9 | 0.00 | ns | -1.6 | 0.00 | s  | -3.4 | 0.00 | s |
| <i>Chek1</i>  | Checkpoint kinase 1                            | -0.4 | 0.22 | ns | -1.2 | 0.17 | ns | -1.9 | 0.00 | s |

987 Red marked for significantly increase expression, Green marked for significantly decrease expression.

988 s, significant; ns, no significant.

989

990
